# Supplementary material for: Failure mechanisms of the Li(Ni 0.6 Co 0.2 Mn 0.2 )O 2 -Li 4 Ti 5 O 12 lithium-ion batteries in long-time high-rate cycle
Source: Royal Society of Chemistry journal article supplement (doi:10.1039/d4ra00923a), 2024-01-01
Supplement: d4ra00923a6.pdf [file d4ra00923a6.pdf]

## Supporting Information

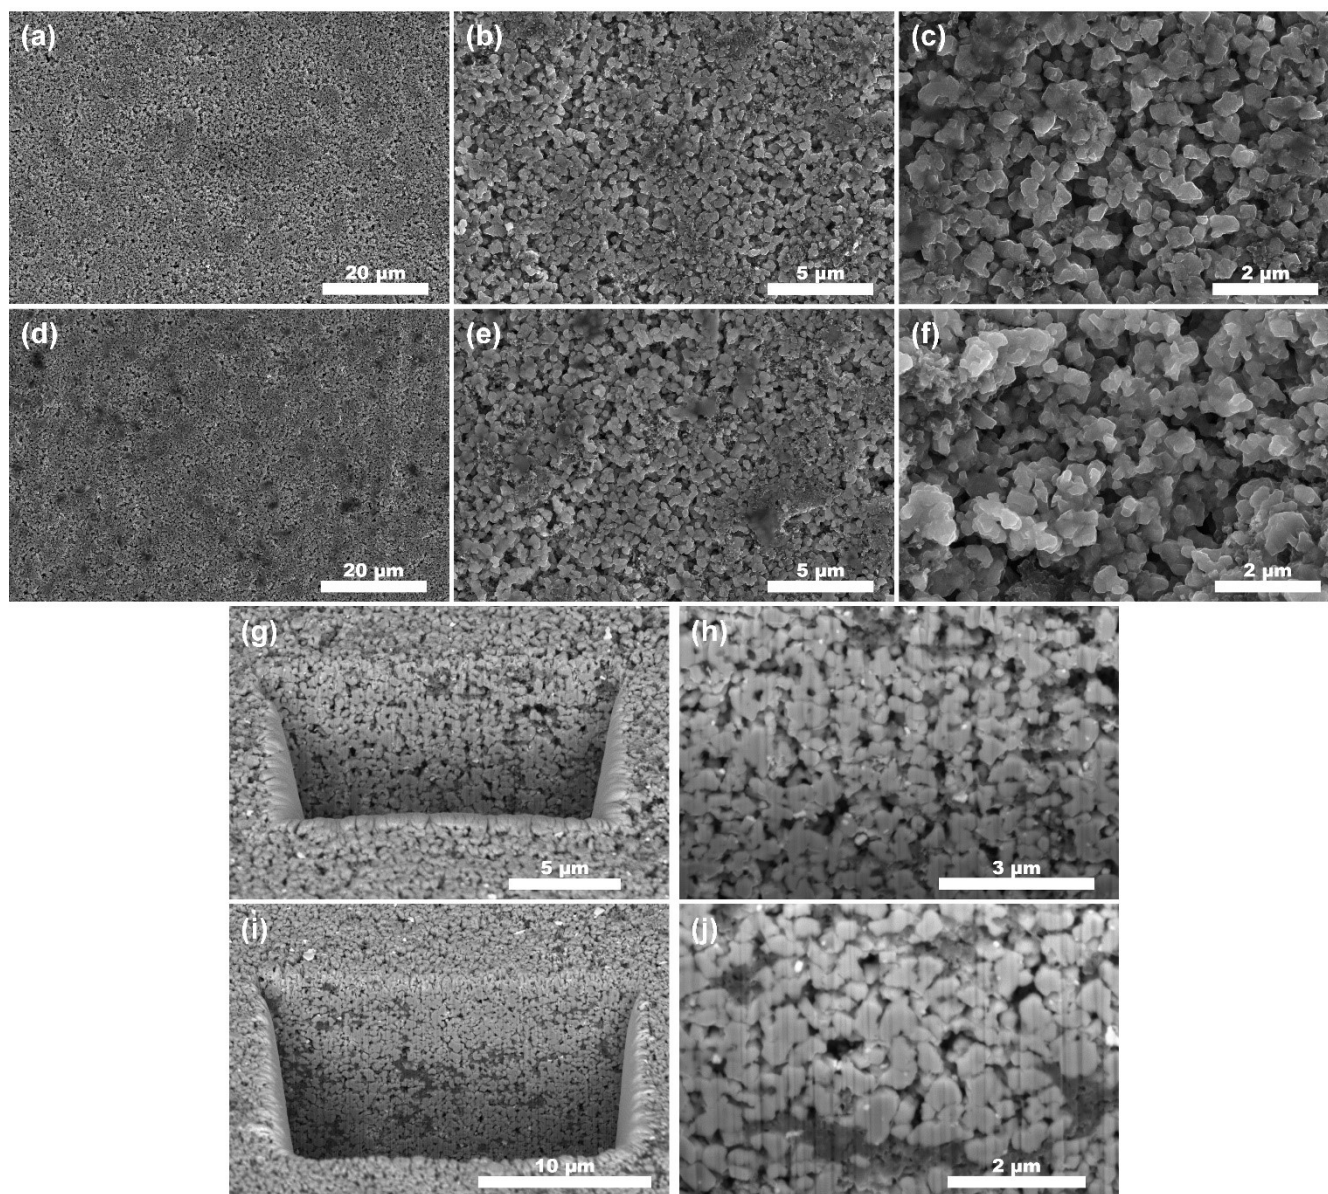

**Figure S1.** FESEM images of LTO electrodes of (a)-(c) fresh batteries (d)-(f) cycled batteries; internal SEM images by FIB cutting of LTO electrodes of (g,h) fresh batteries and (i,j) cycled batteries.

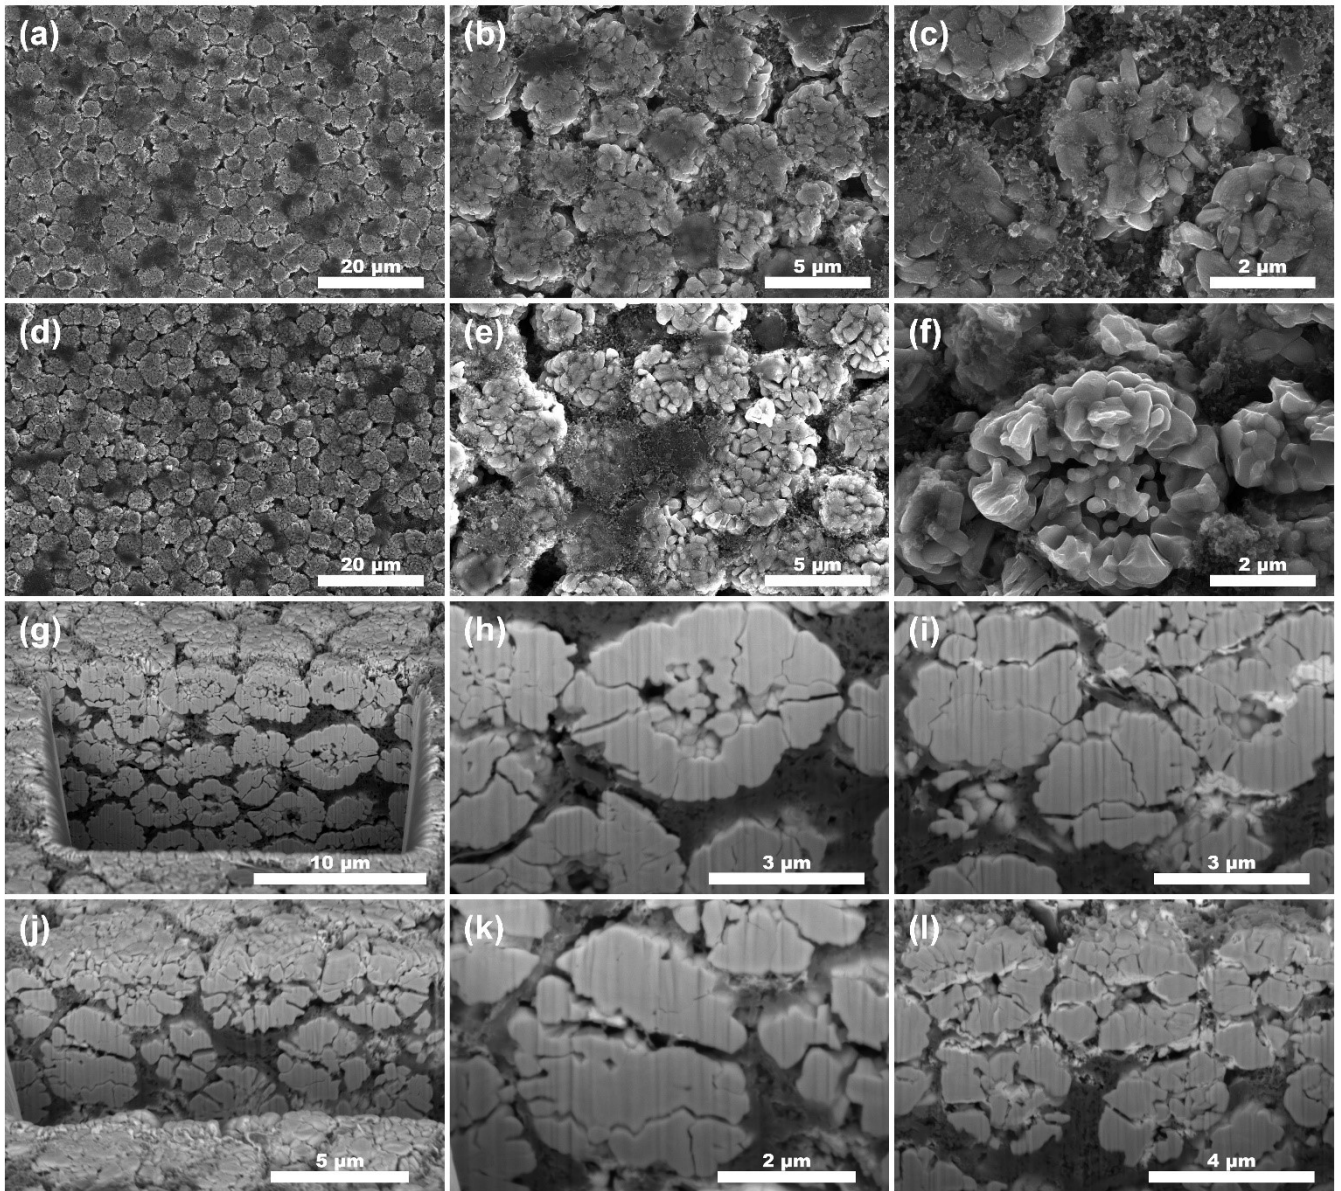

**Figure S2.** FESEM images of NCM electrodes of batteries cycled at (a)-(c) 25 °C (d)-(f) 35 °C; internal SEM images by FIB cutting of NCM electrodes of batteries cycled at (g)-(i) 25 °C (j)-(l) 35 °C.

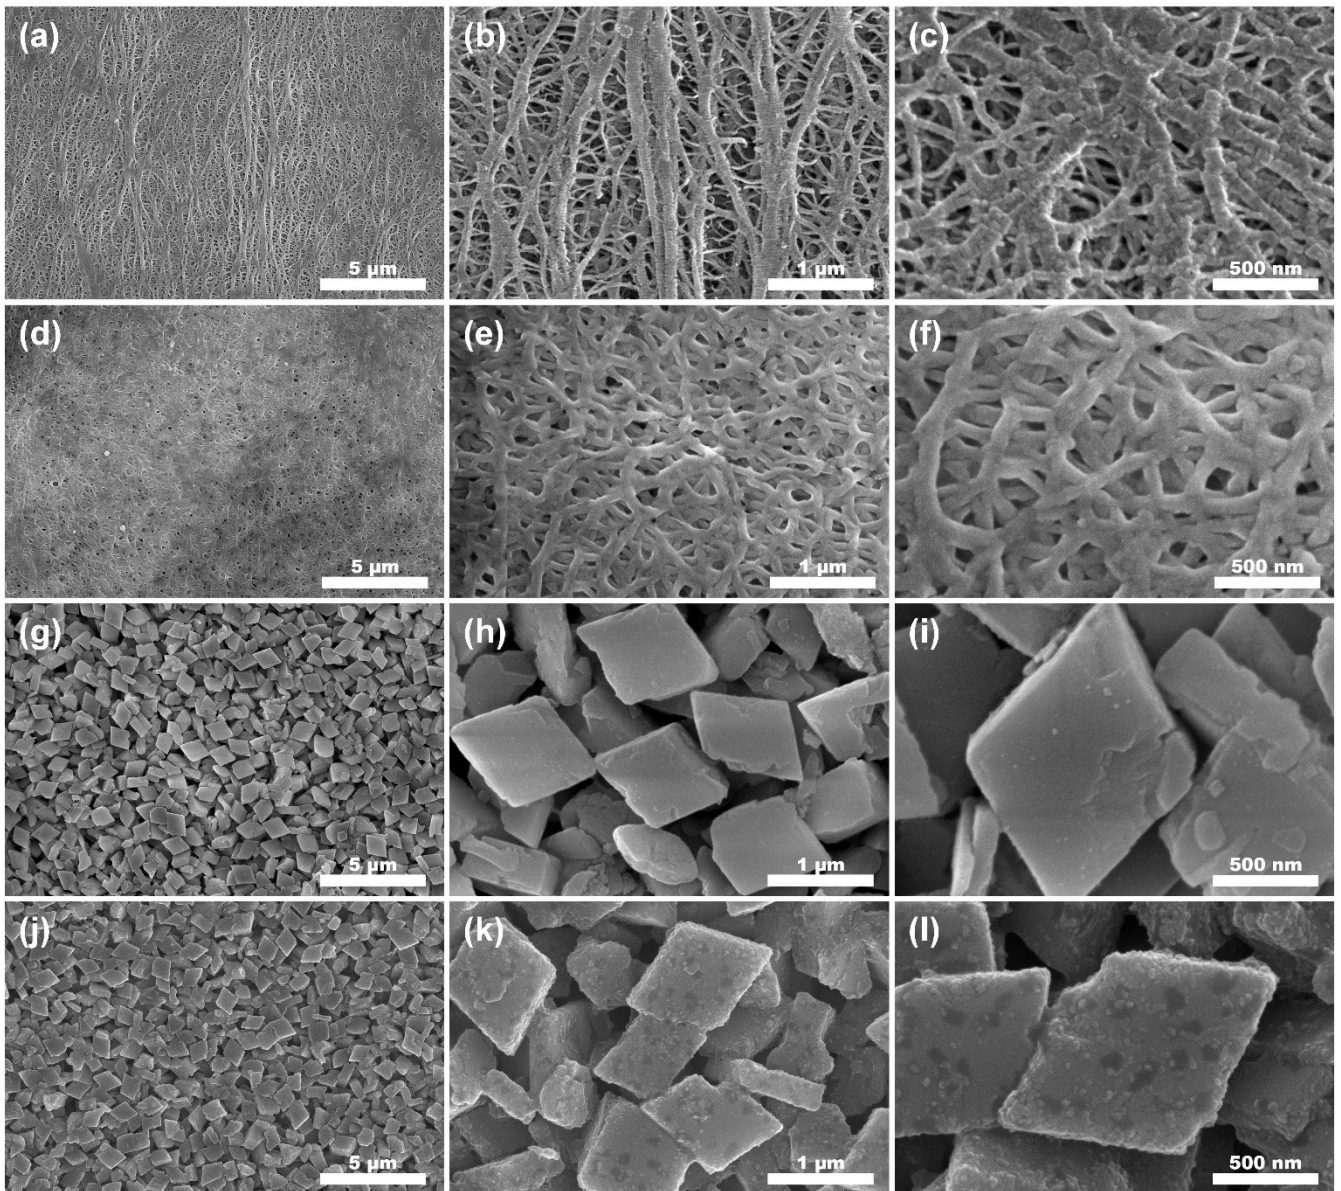

**Figure S3.** FESEM images of the two sides of separators of fresh batteries (a-c, g-i) and cycled batteries (d-f, j-l).



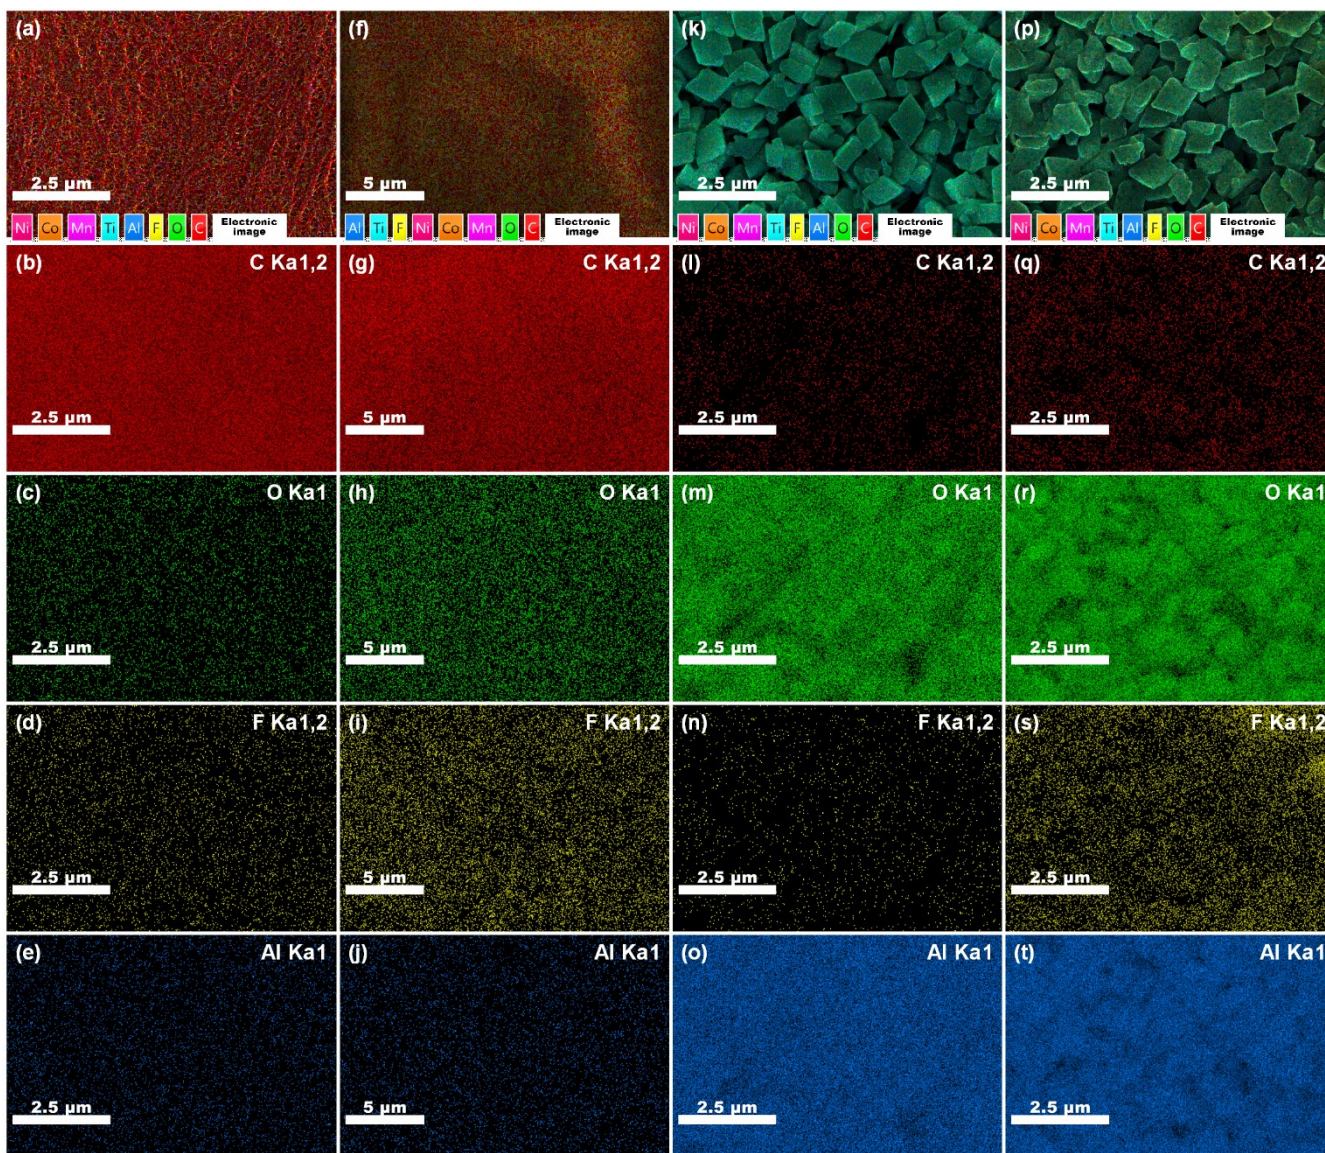

**Figure S4.** Images by EDS of the distribution of elements on two sides (PP: a-j, Al<sub>2</sub>O<sub>3</sub>: k-t) of separators of fresh batteries (a-e, k-o) and cycled batteries (f-j, p-t).

**Table S1.** Ratios of elements (from XPS) on PP and Al<sub>2</sub>O<sub>3</sub> surfaces of different sample separators.

| Elements                             |        | C     | O     | F     | Al    | Li    |
|--------------------------------------|--------|-------|-------|-------|-------|-------|
| PP (At%)                             | Fresh  | 92.04 | 4.12  | 0.87  | 0.40  | 2.57  |
|                                      | Cycled | 75.09 | 16.05 | 4.37  | 0.52  | 3.97  |
| Al <sub>2</sub> O <sub>3</sub> (At%) | Fresh  | 26.94 | 40.60 | 7.63  | 19.30 | 5.53  |
|                                      | Cycled | 18.82 | 29.39 | 22.54 | 11.29 | 17.96 |
