# Supplementary figures and images for: Failure mechanisms of the Li(Ni 0.6 Co 0.2 Mn 0.2 )O 2 -Li 4 Ti 5 O 12 lithium-ion batteries in long-time high-rate cycle
Source: Royal Society of Chemistry journal article supplement (doi:10.1039/d4ra00923a), 2024-01-01

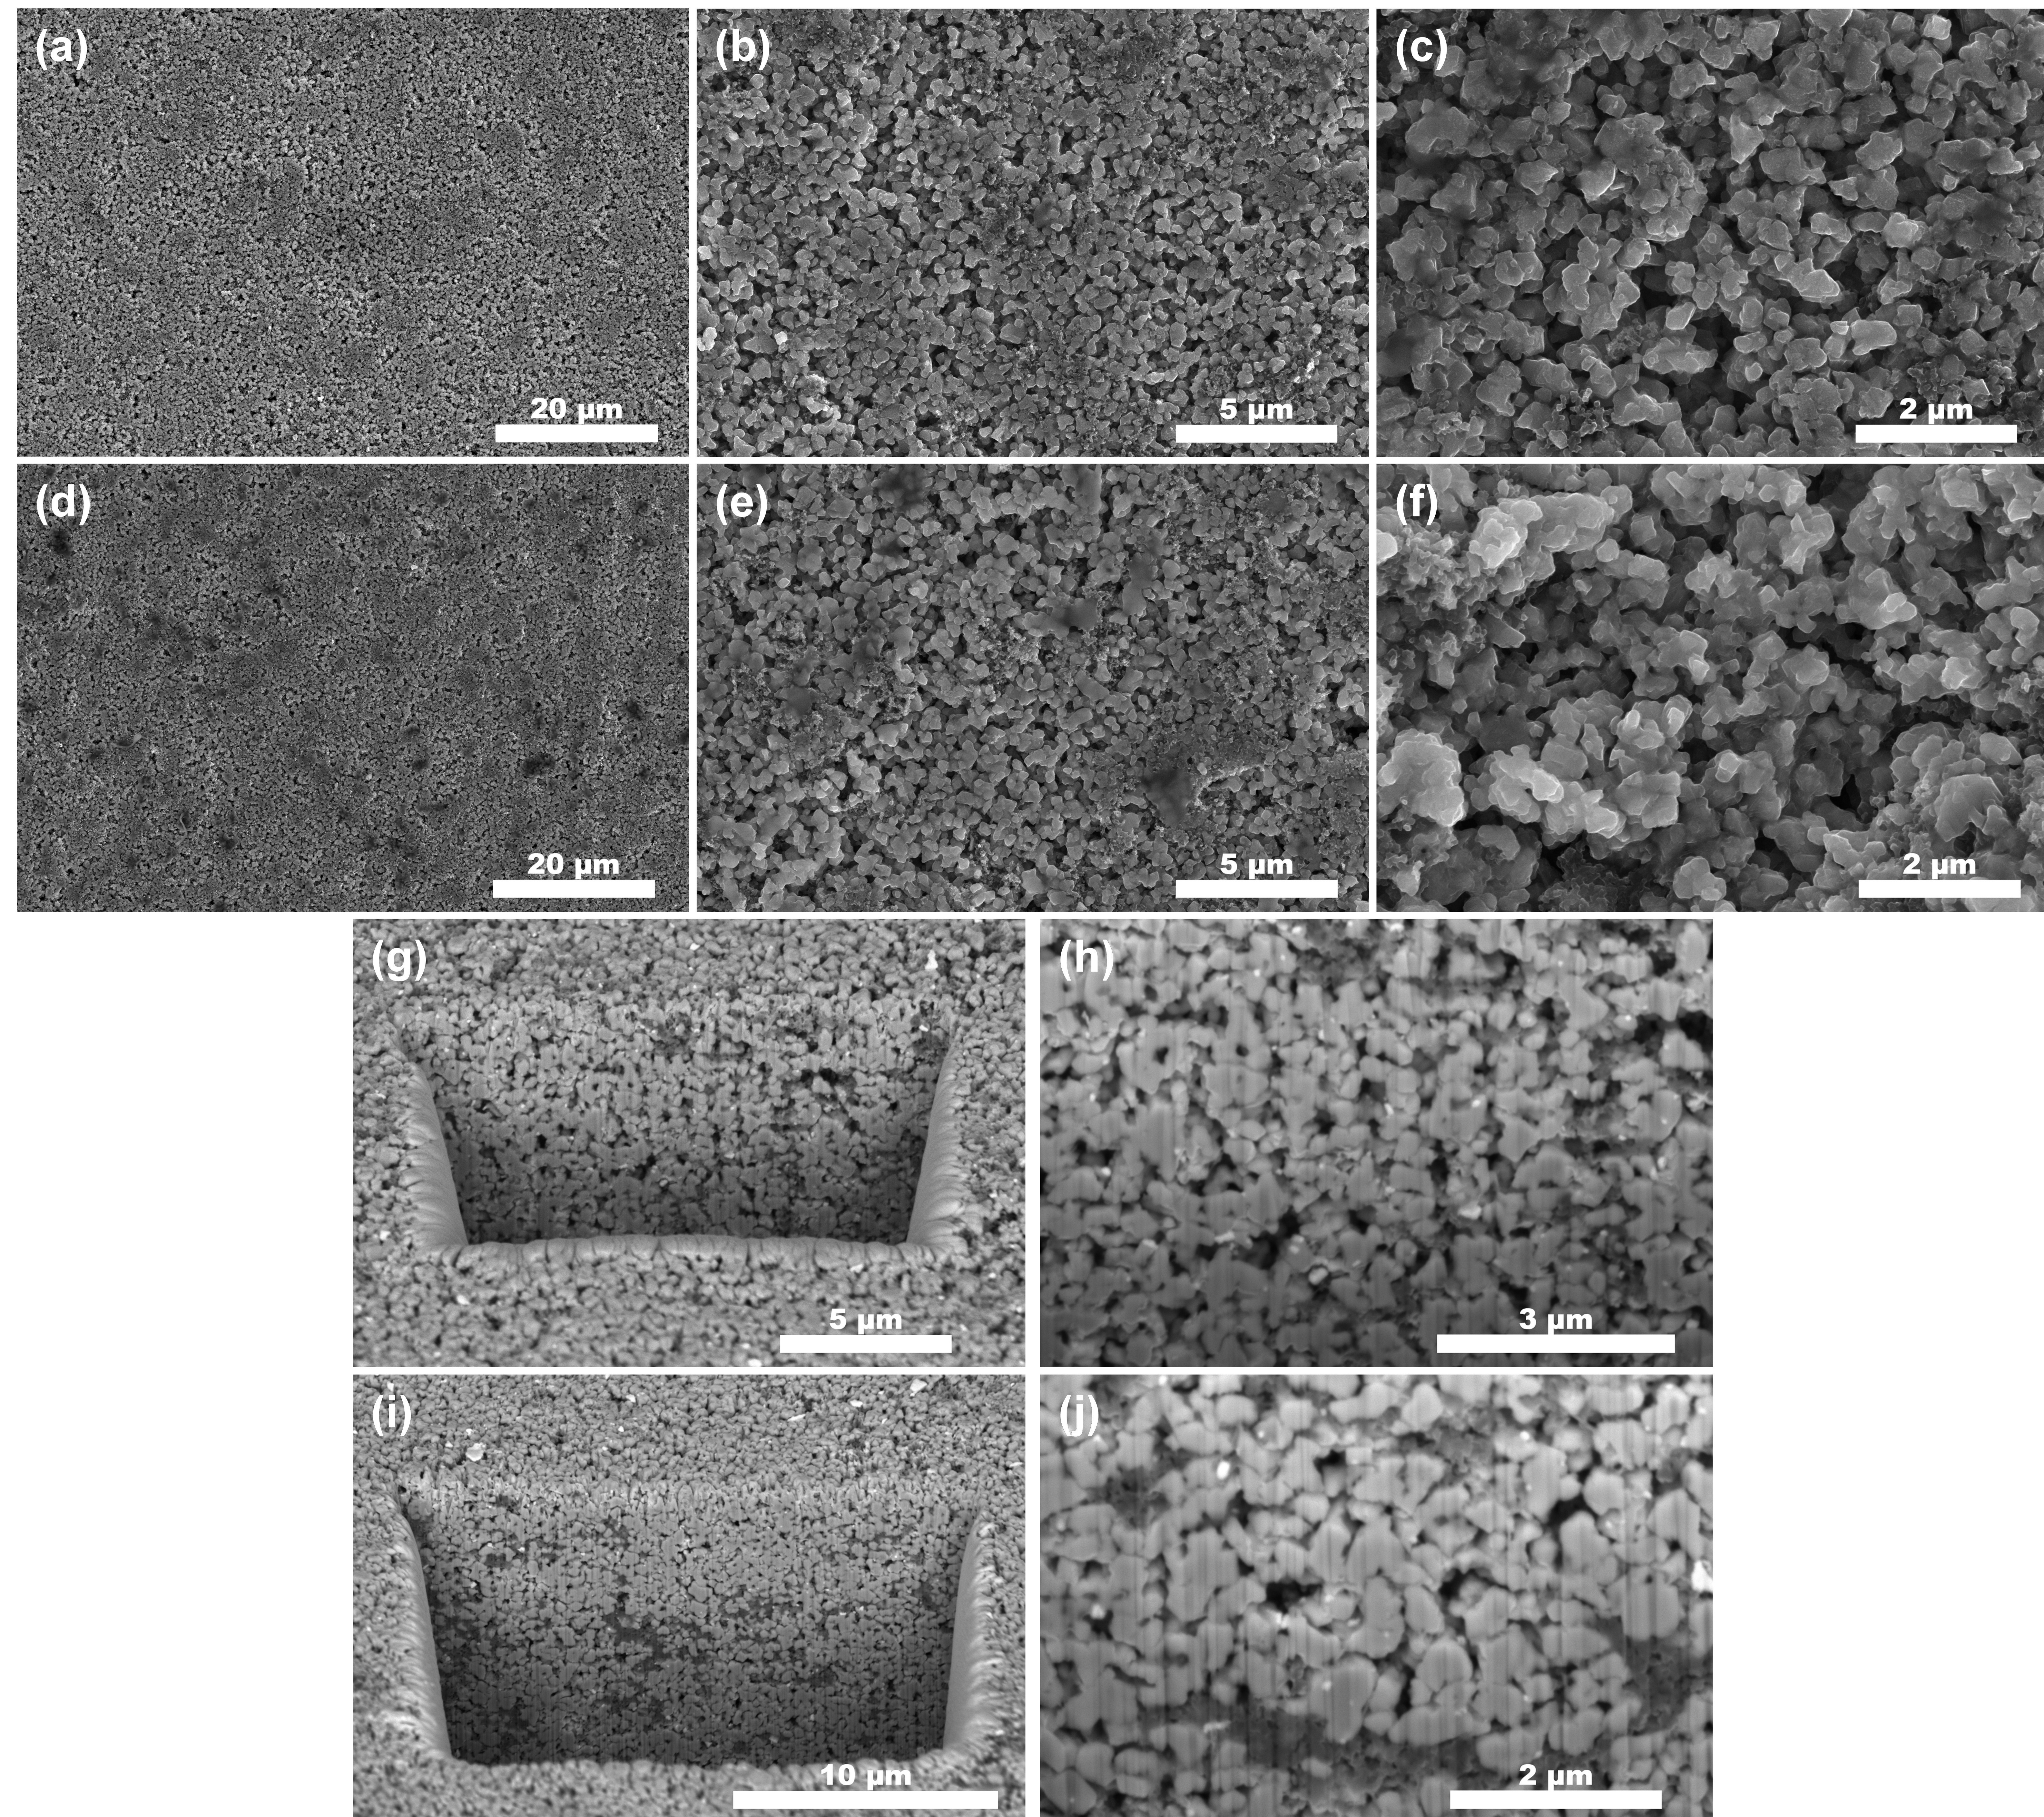

Supplement: d4ra00923a2.pdf [file d4ra00923a2.pdf]

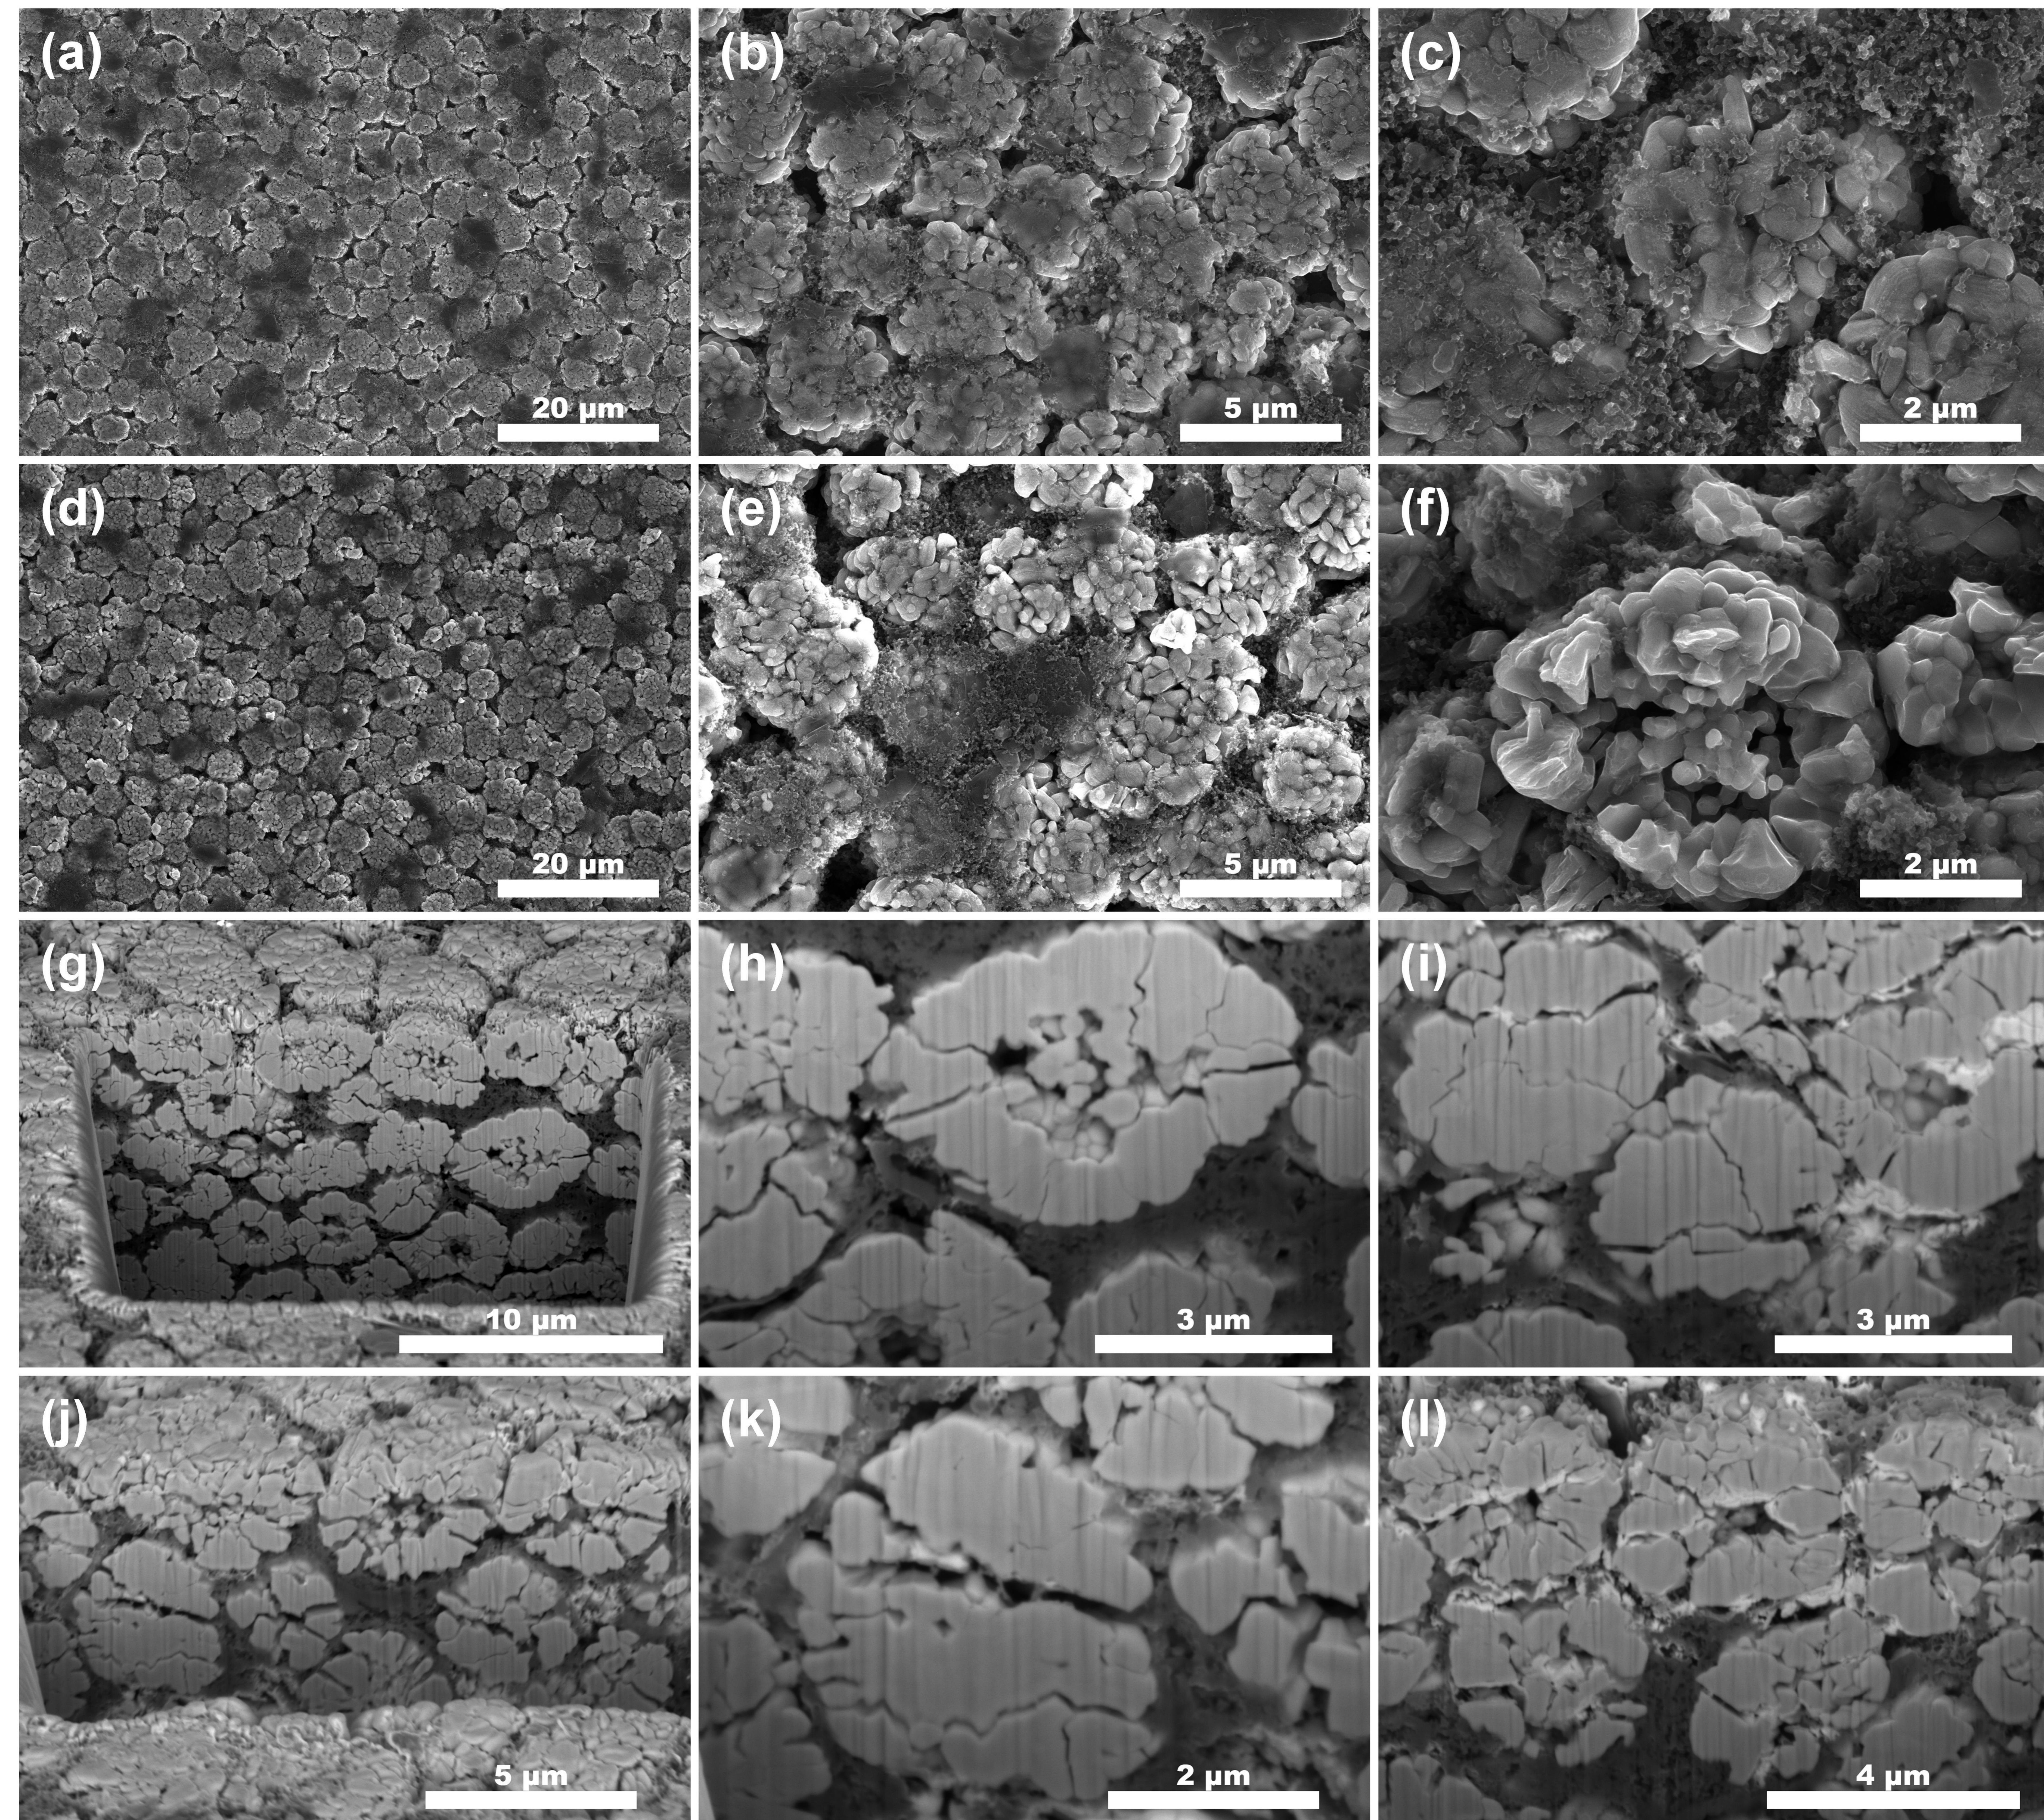

Supplement: d4ra00923a3.pdf [file d4ra00923a3.pdf]

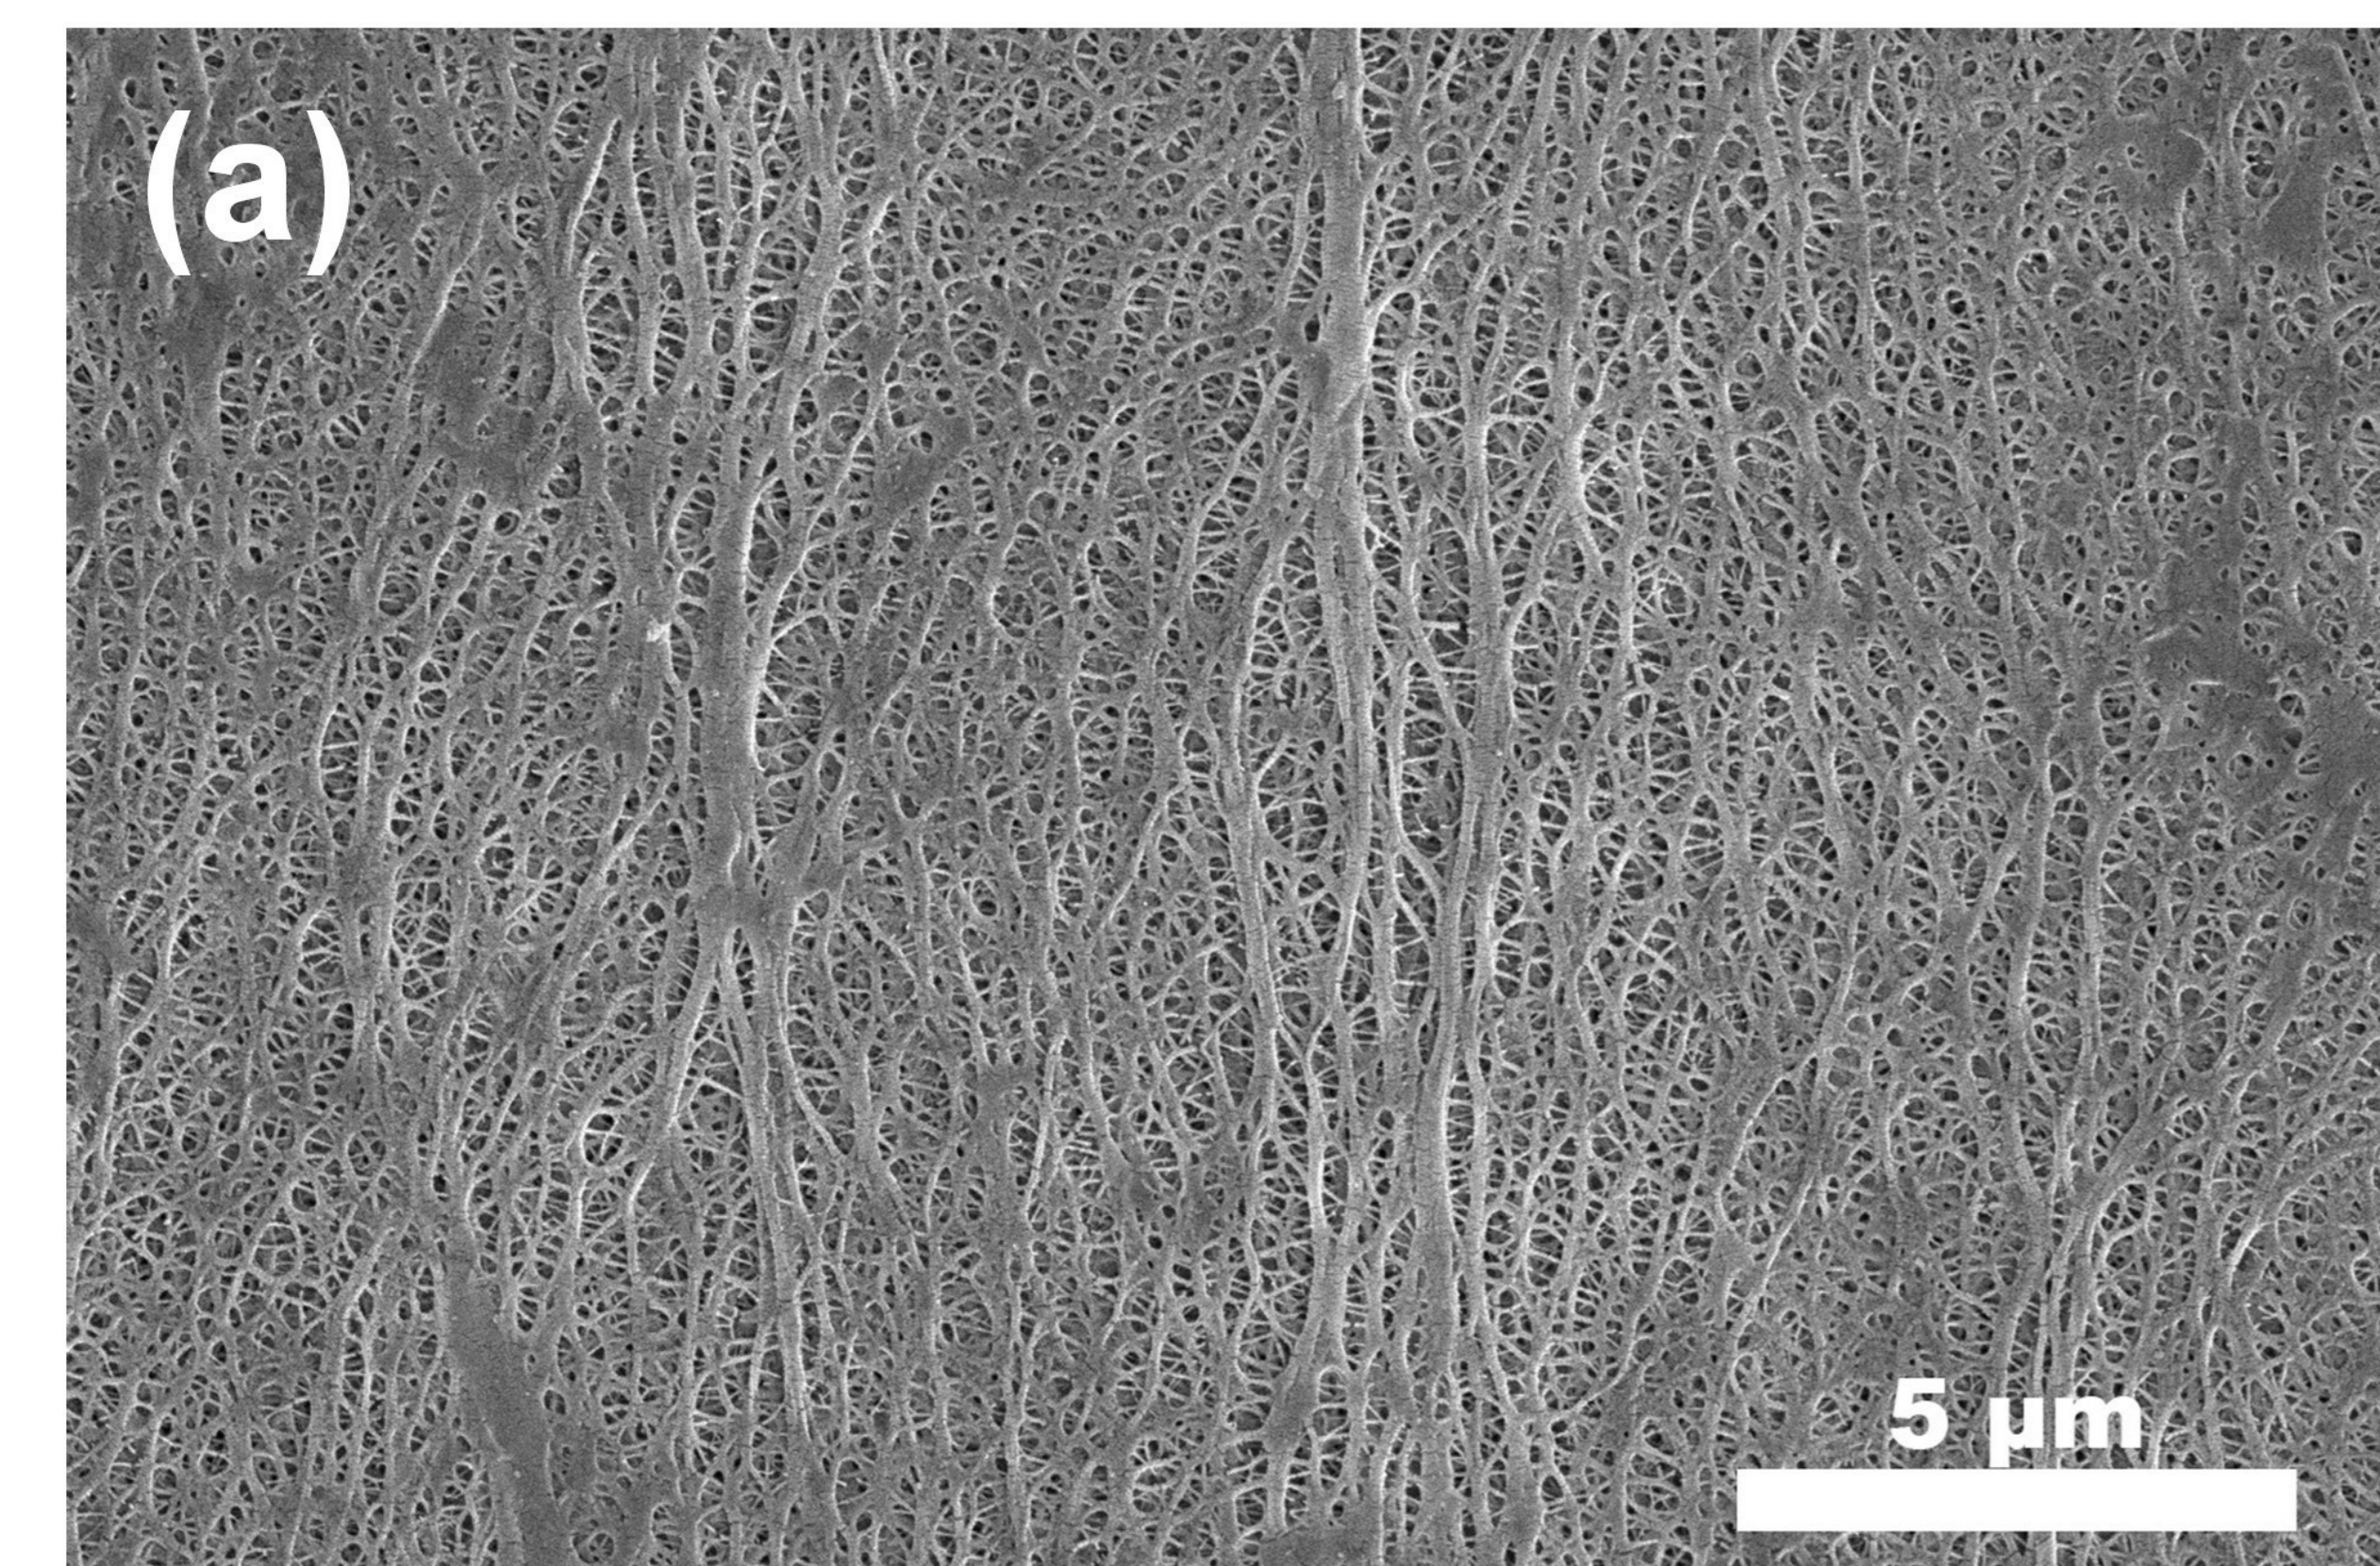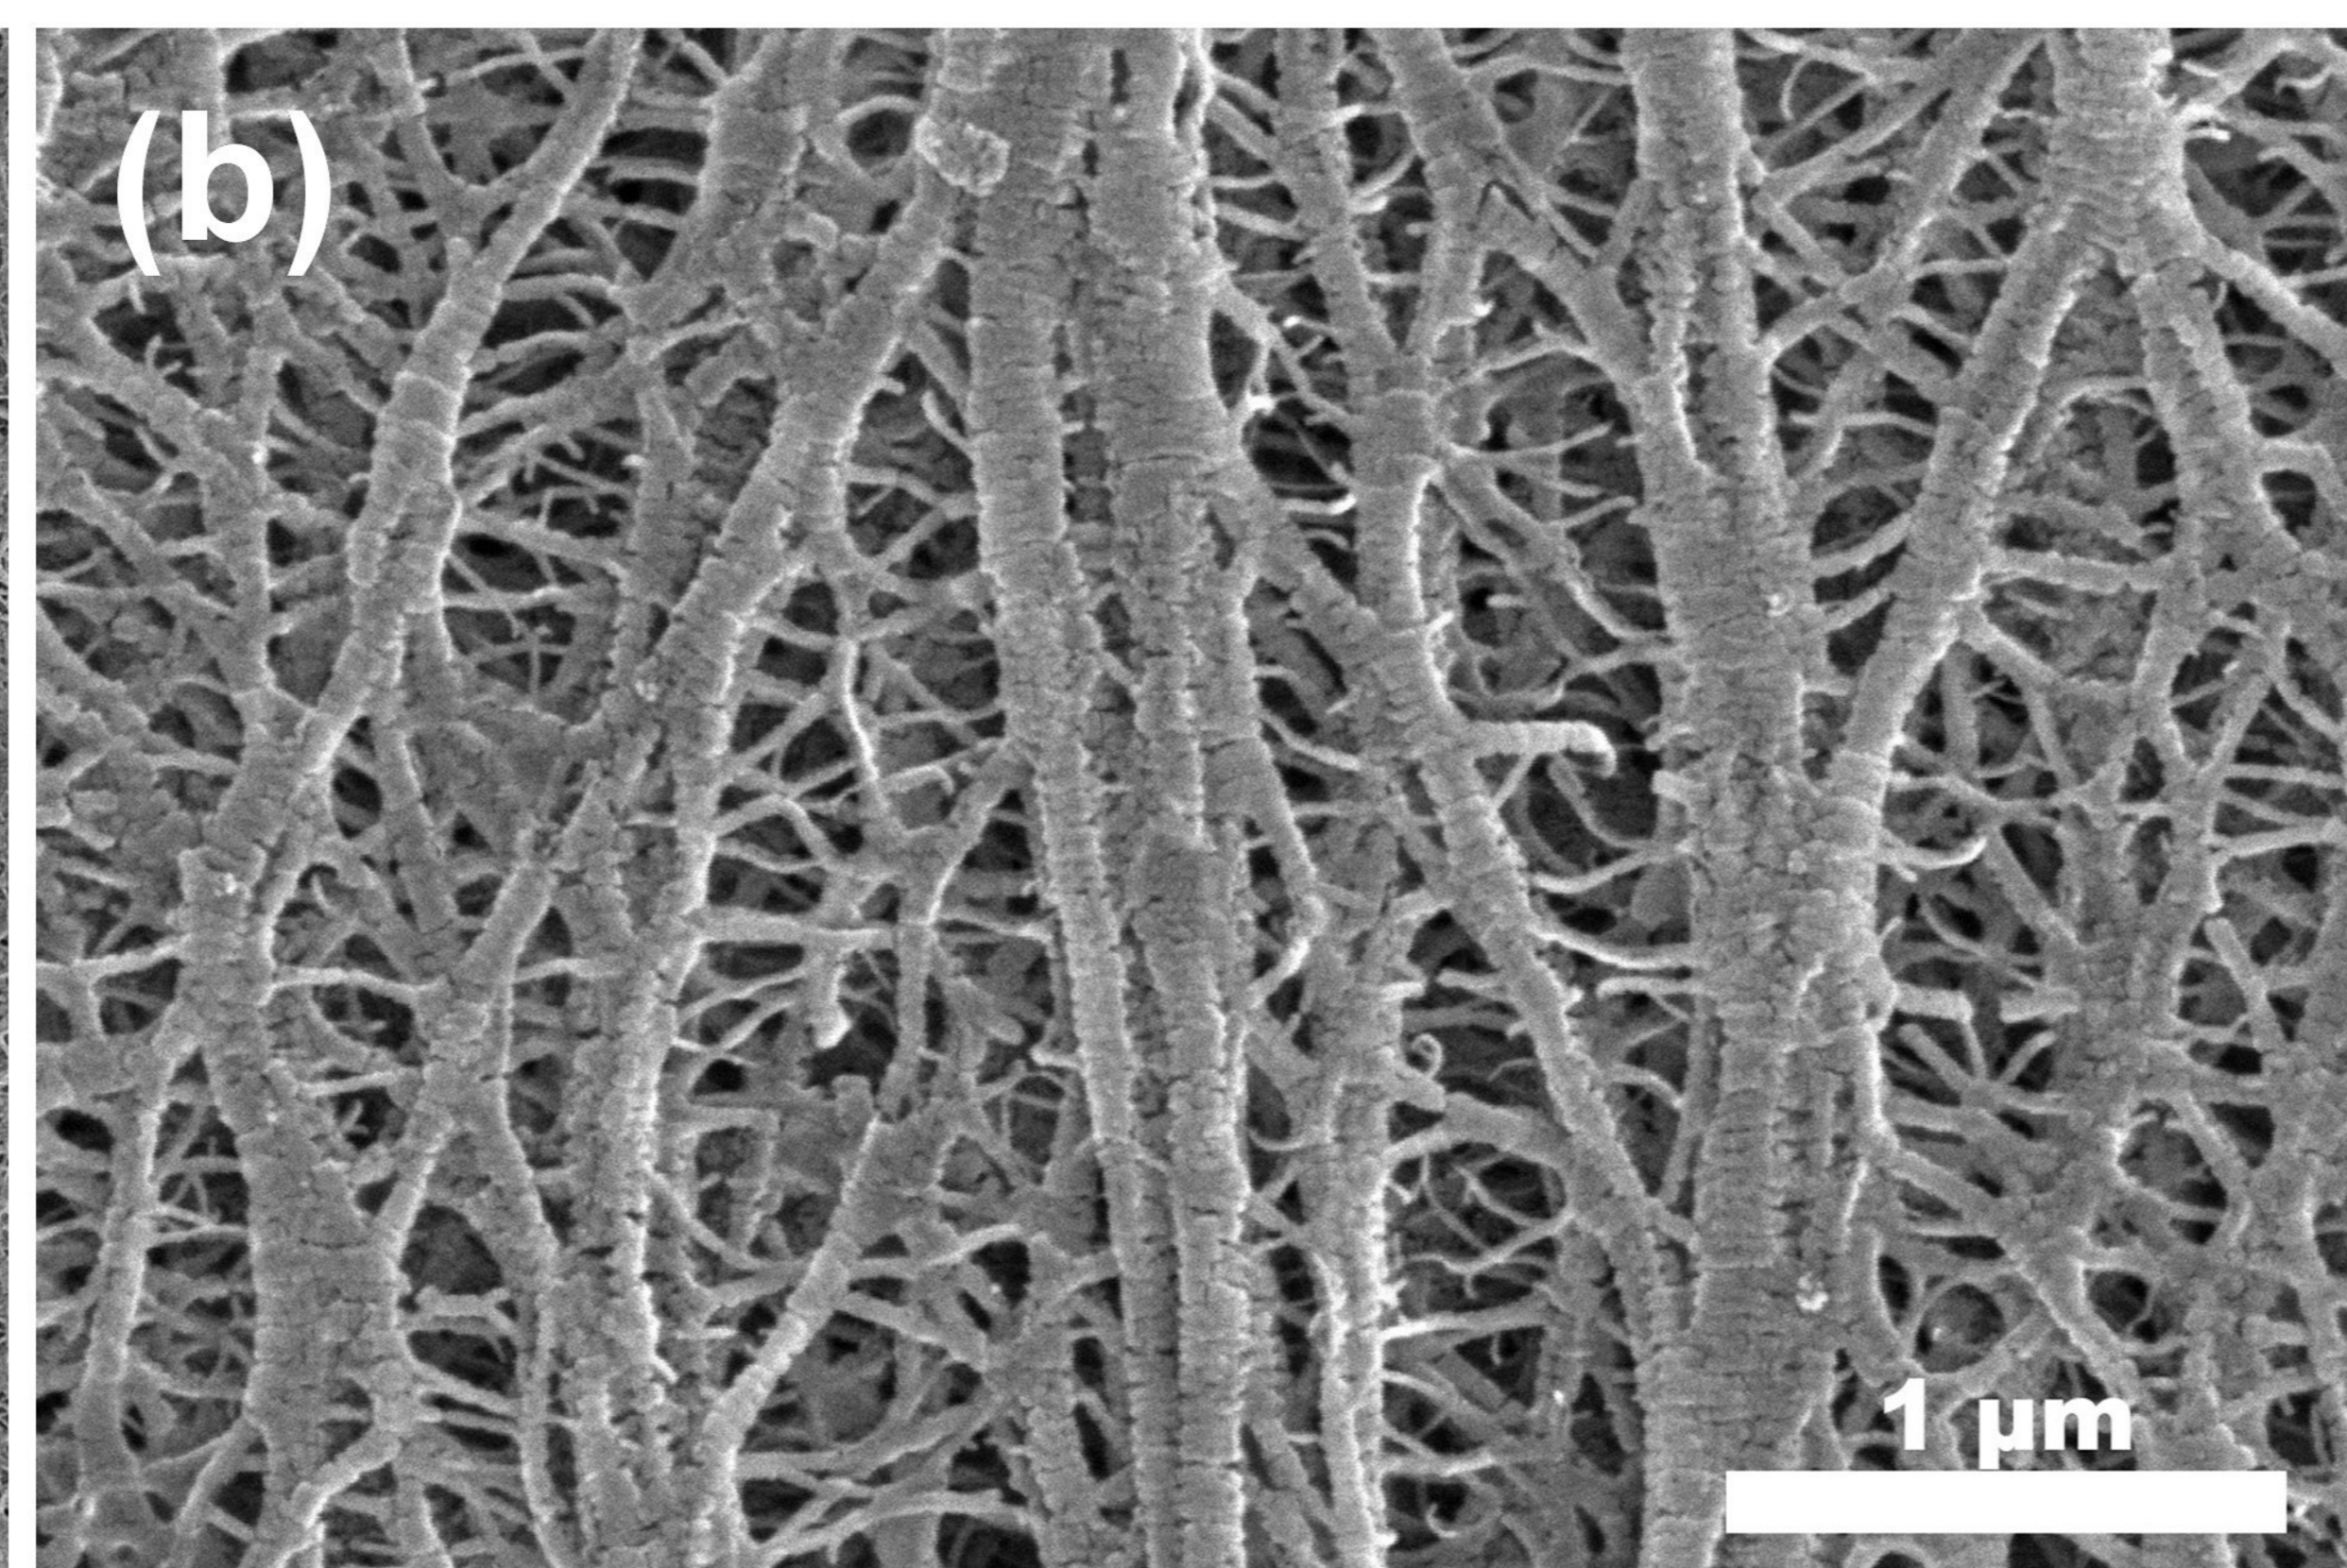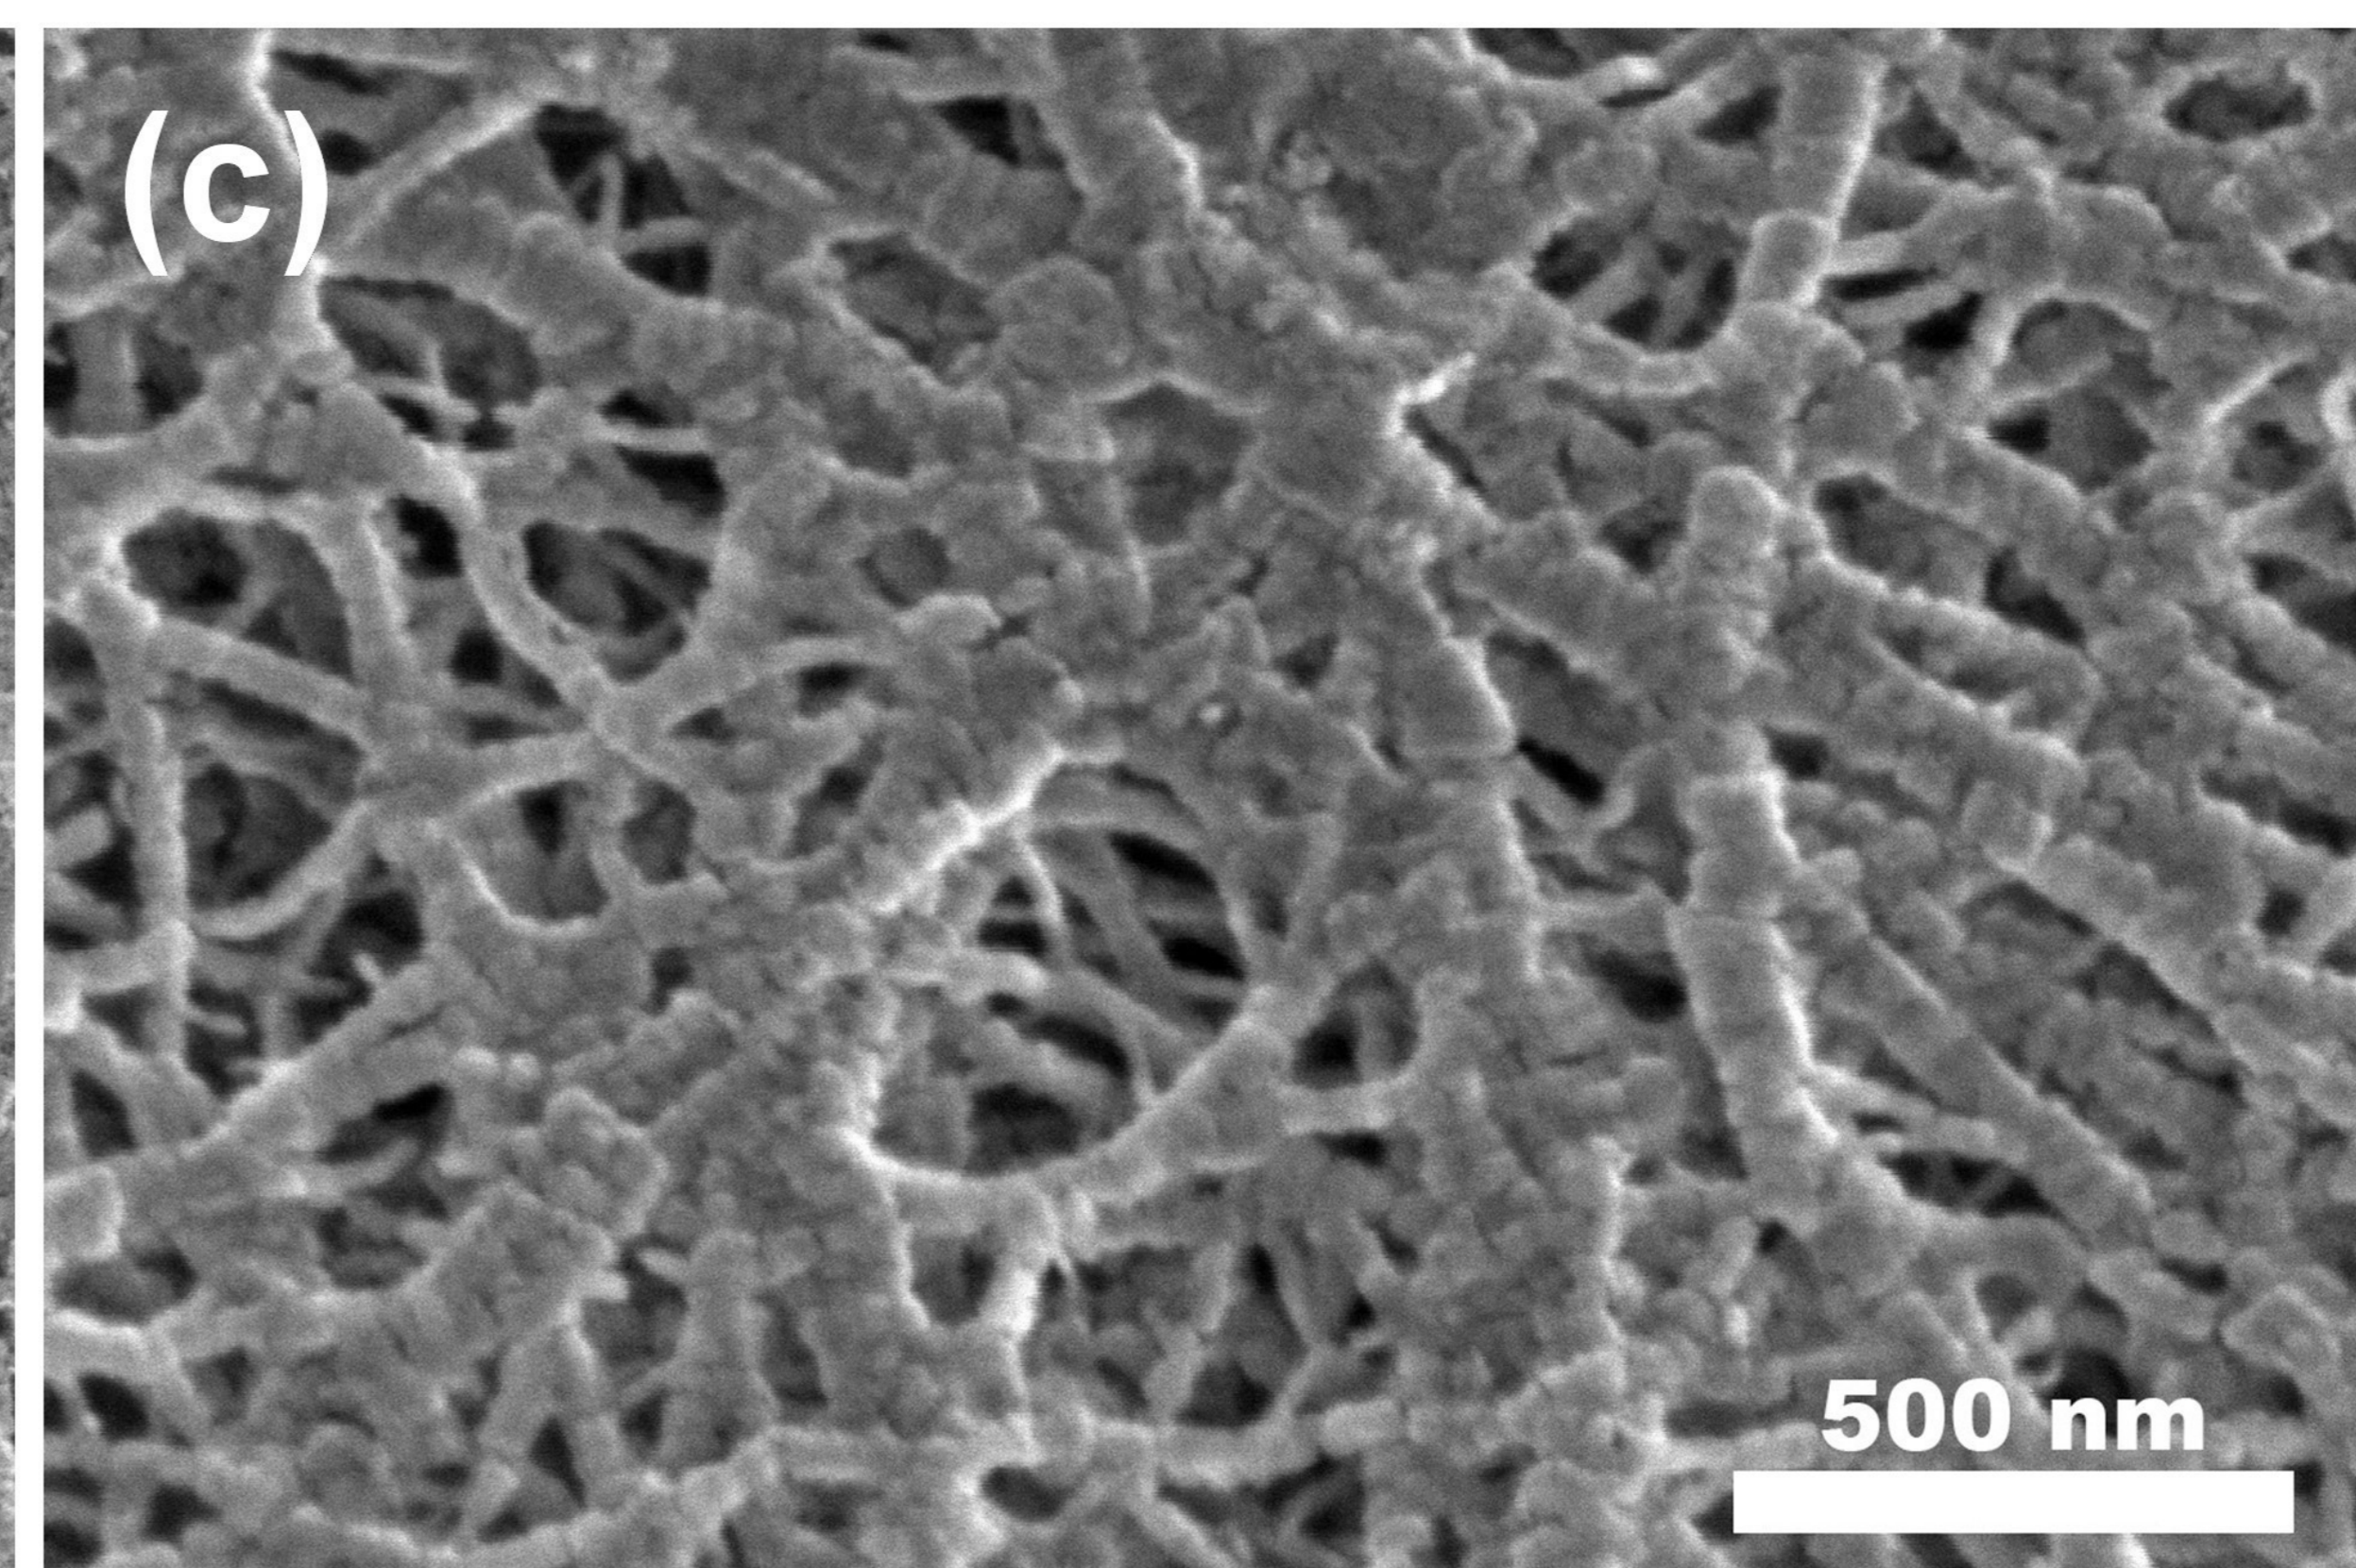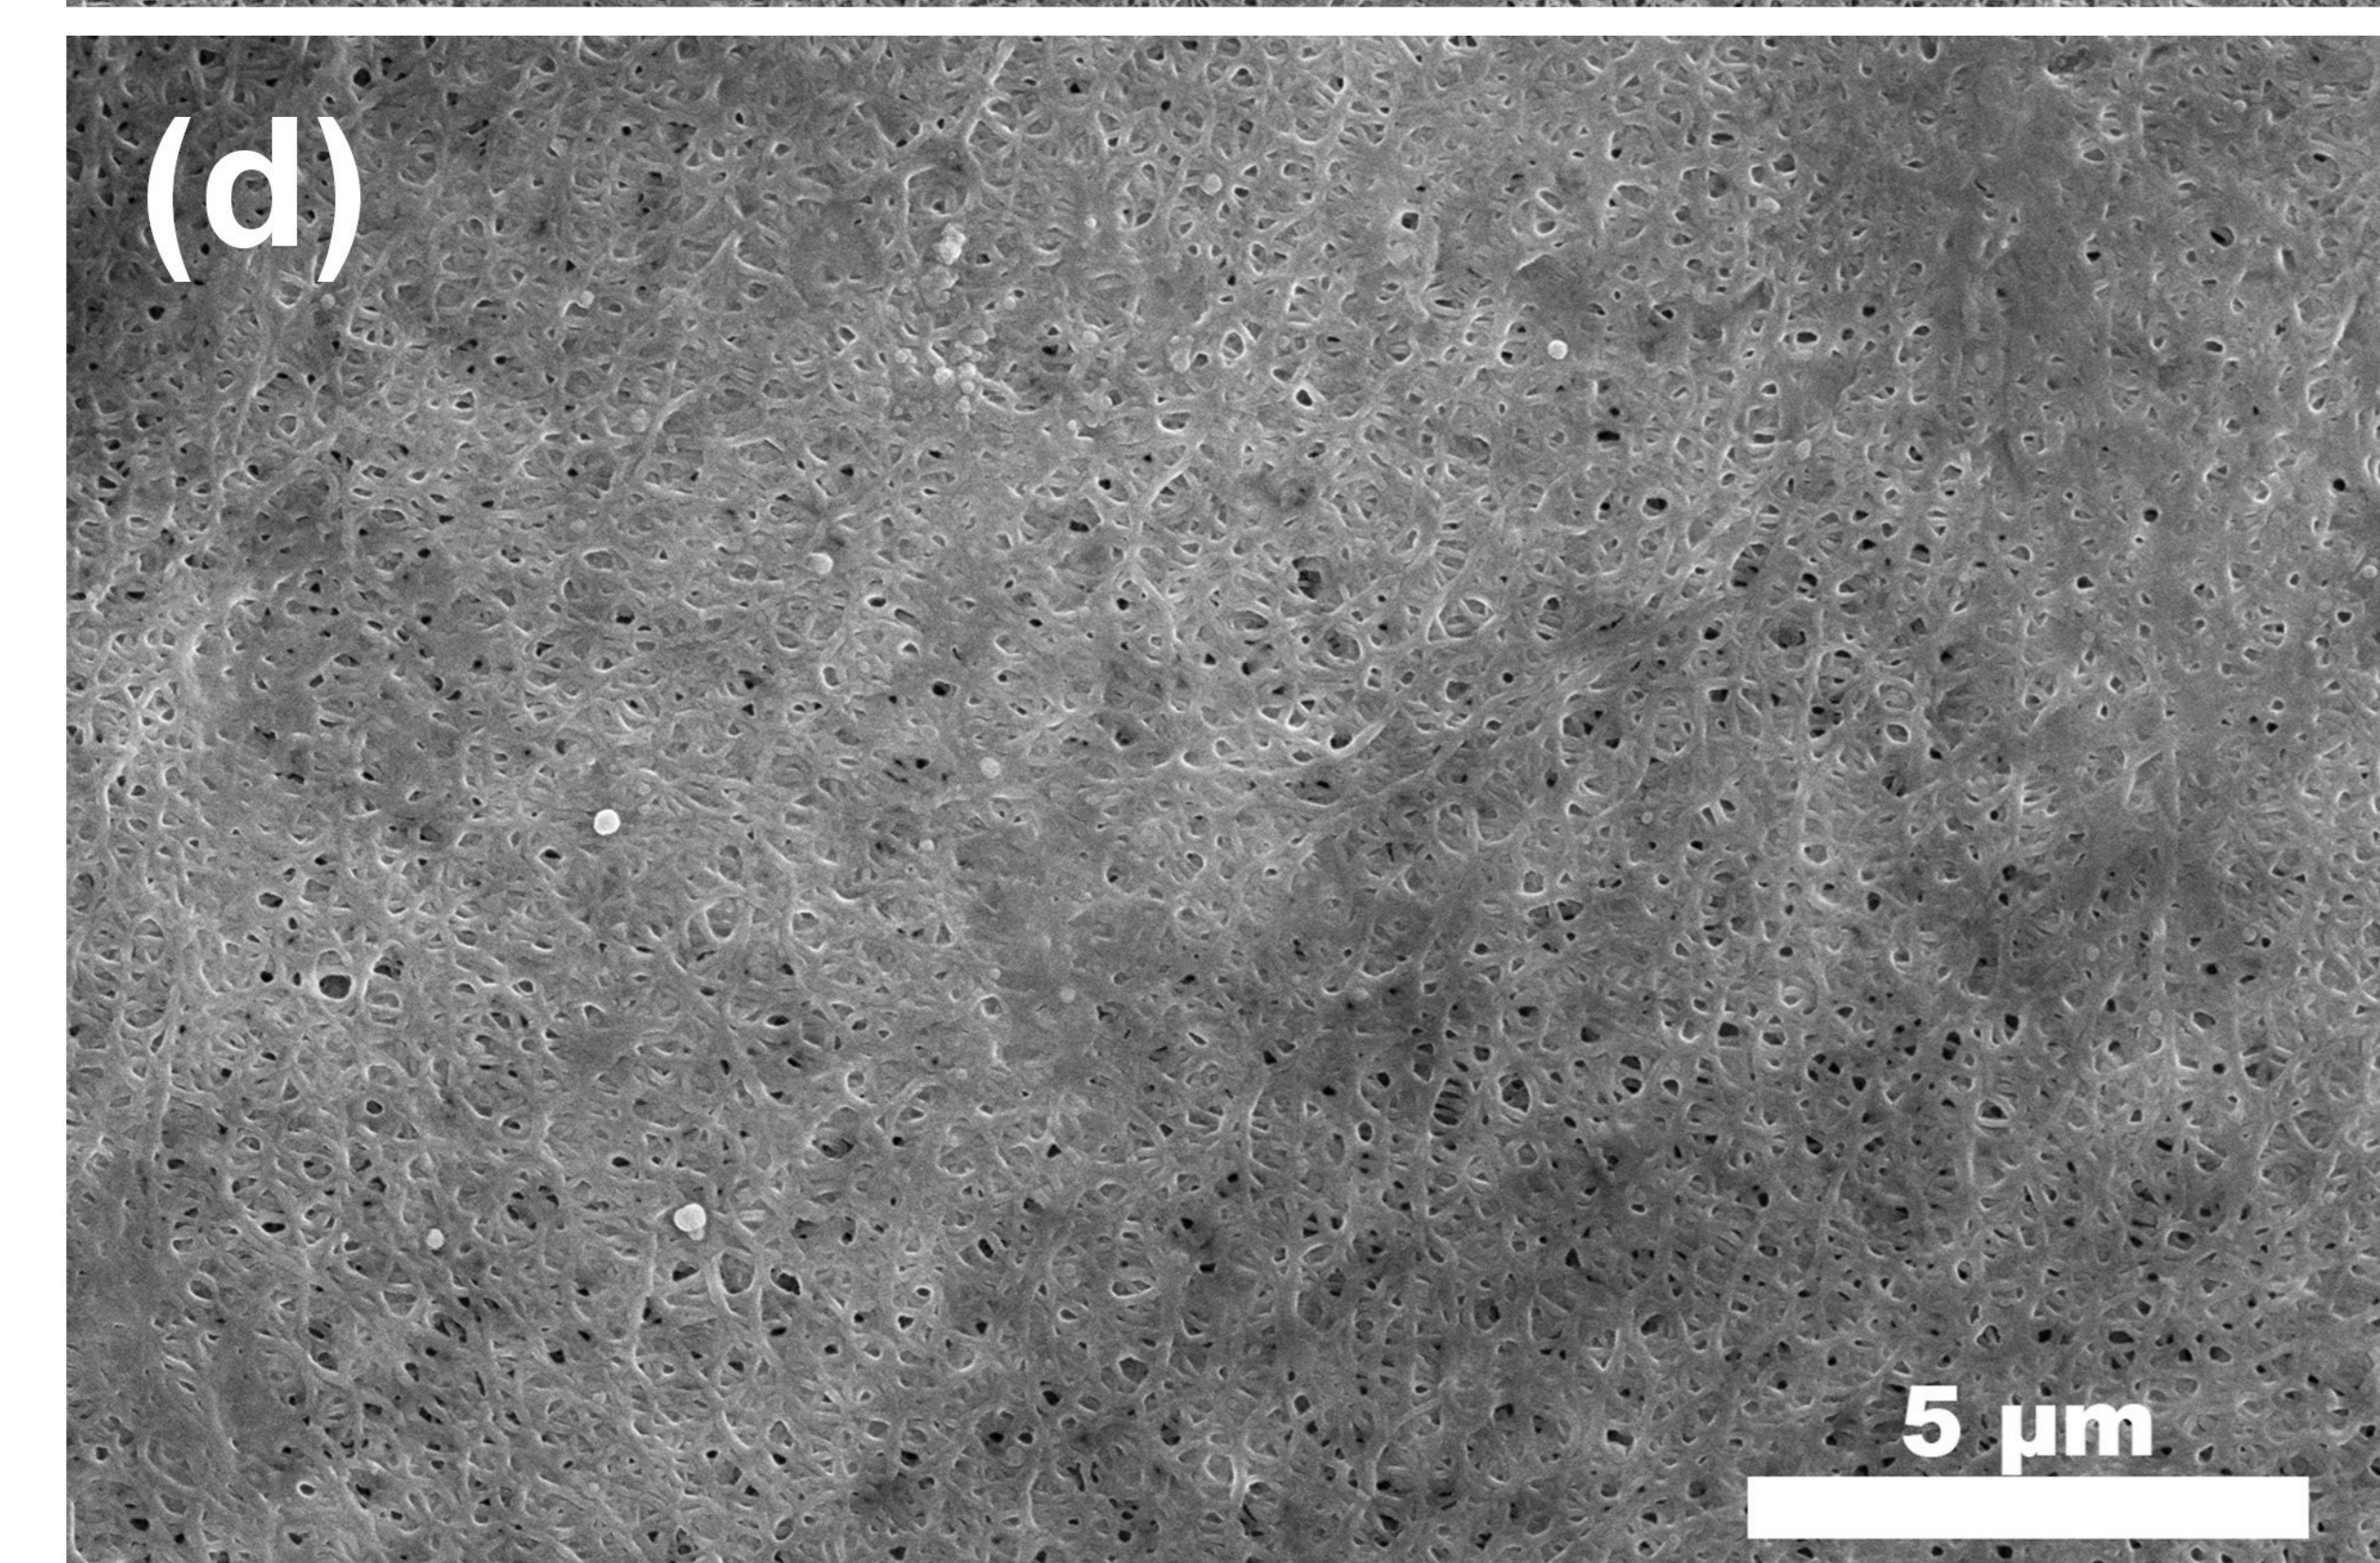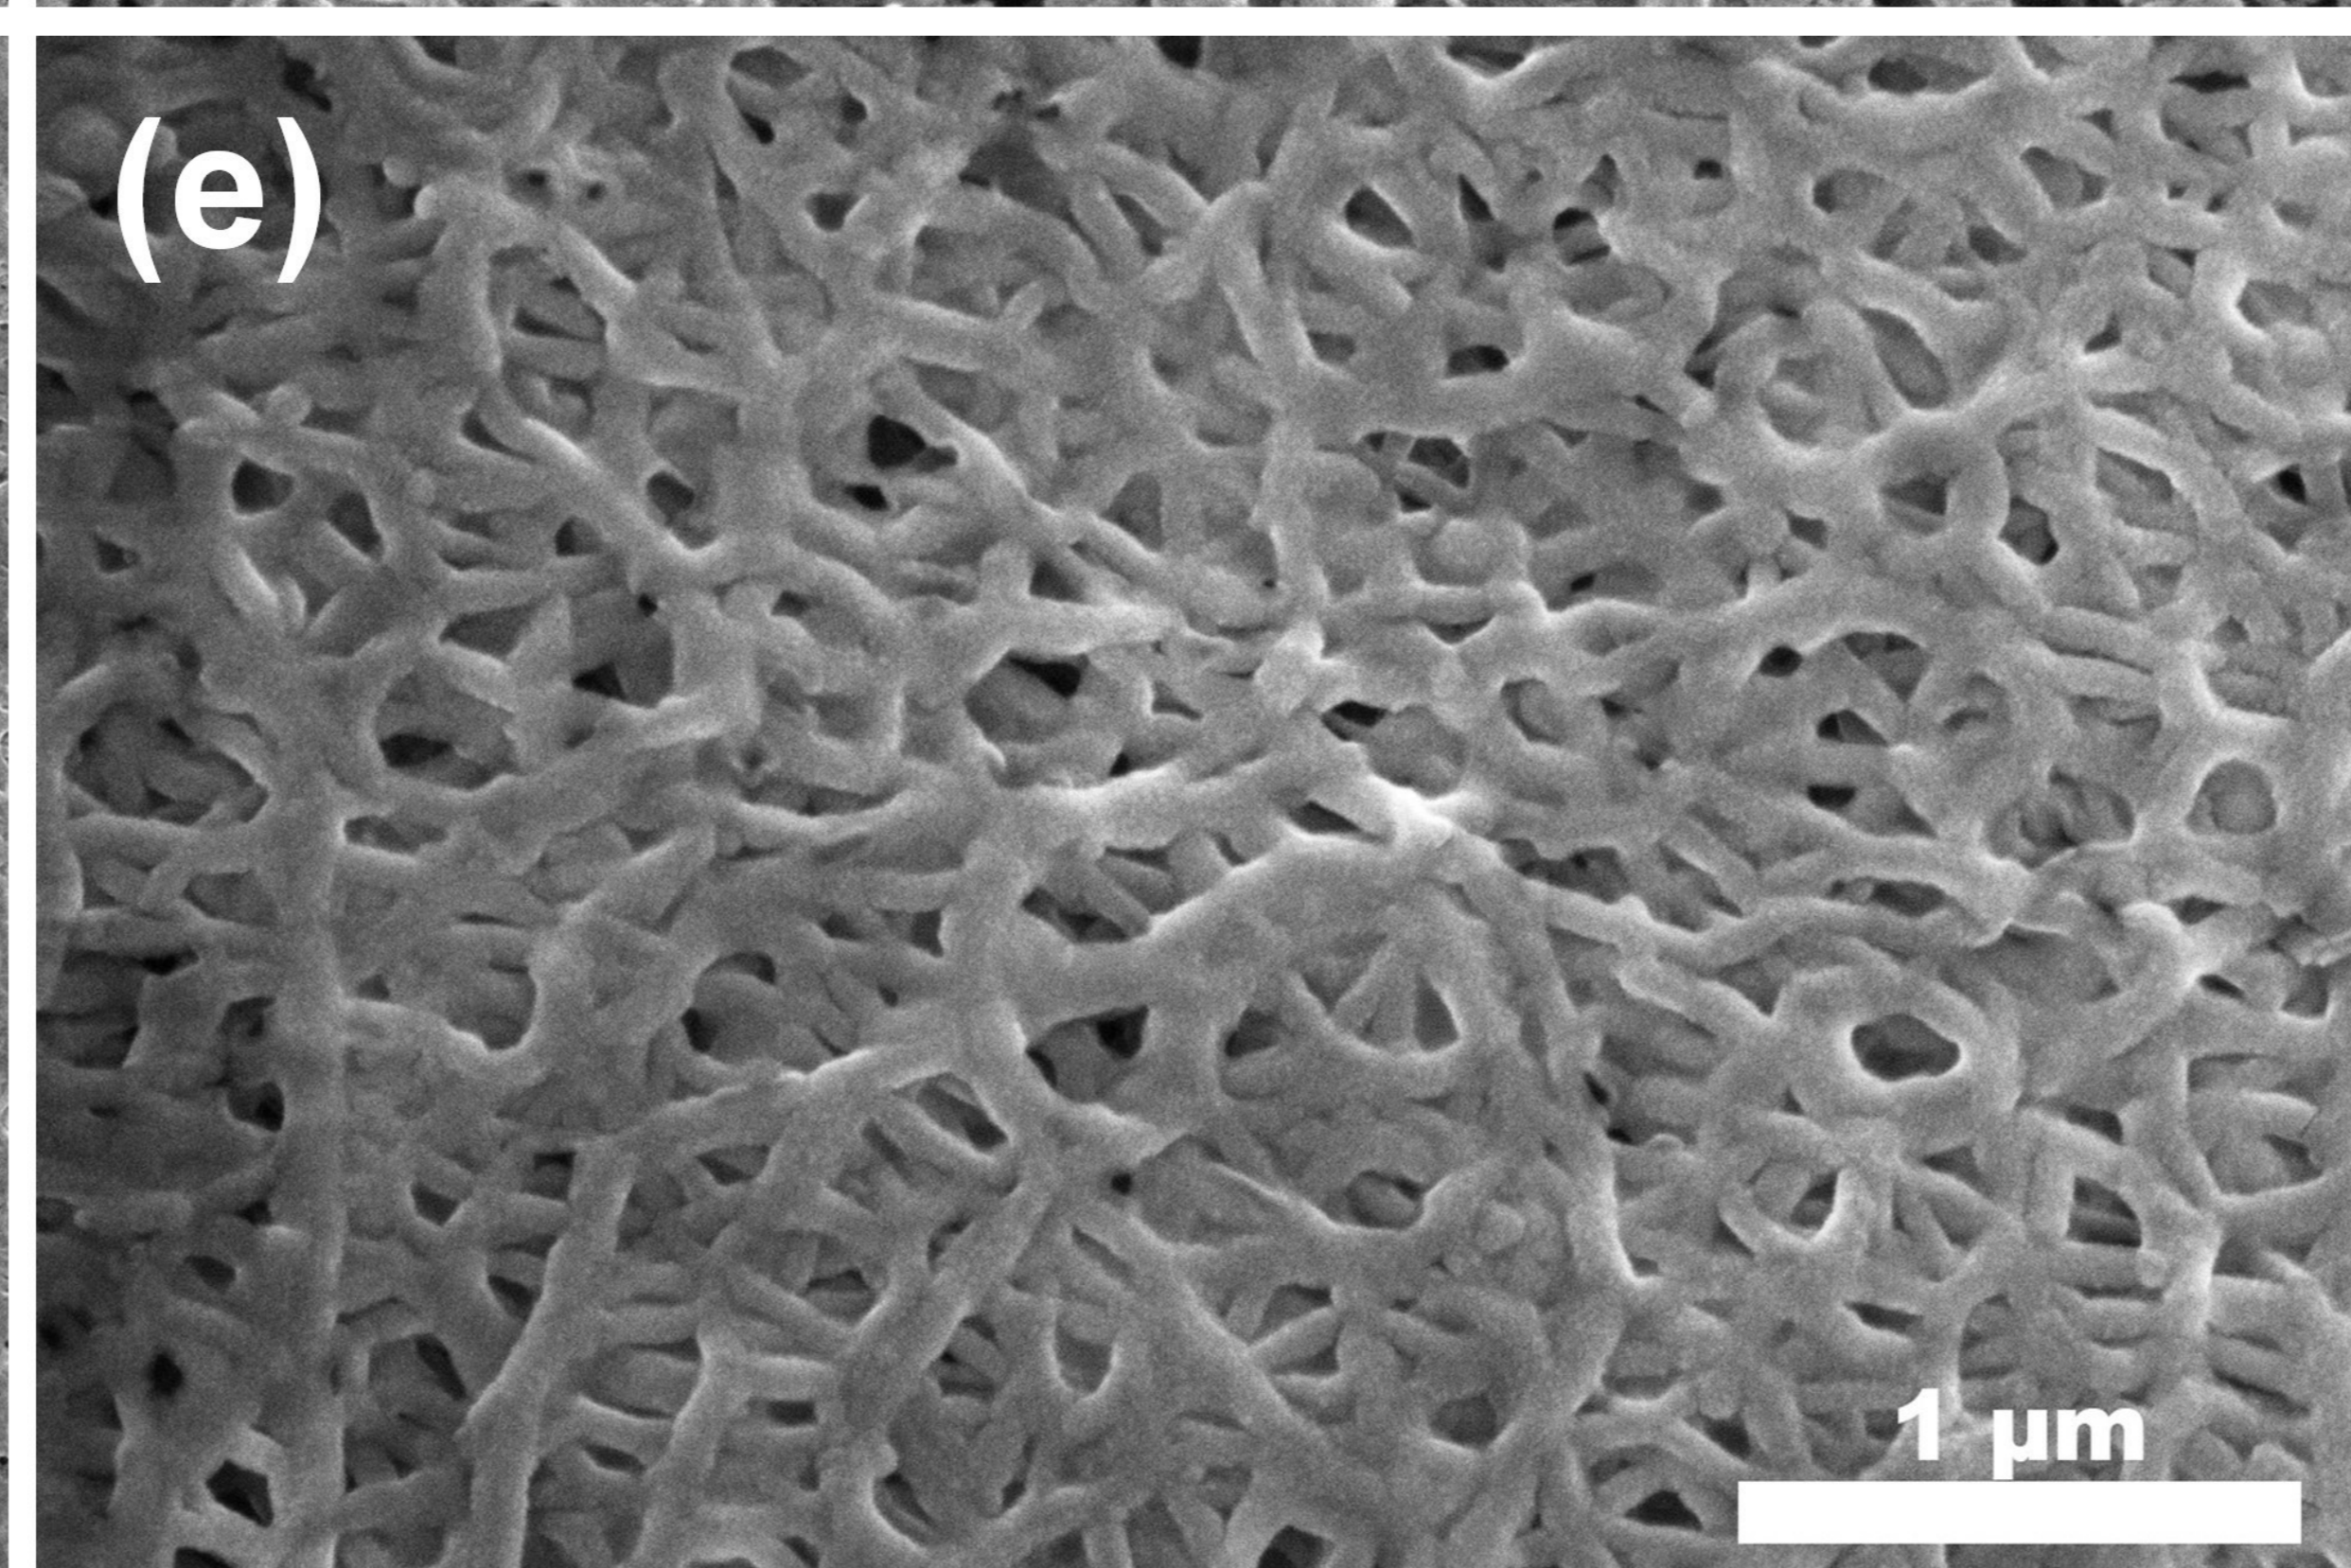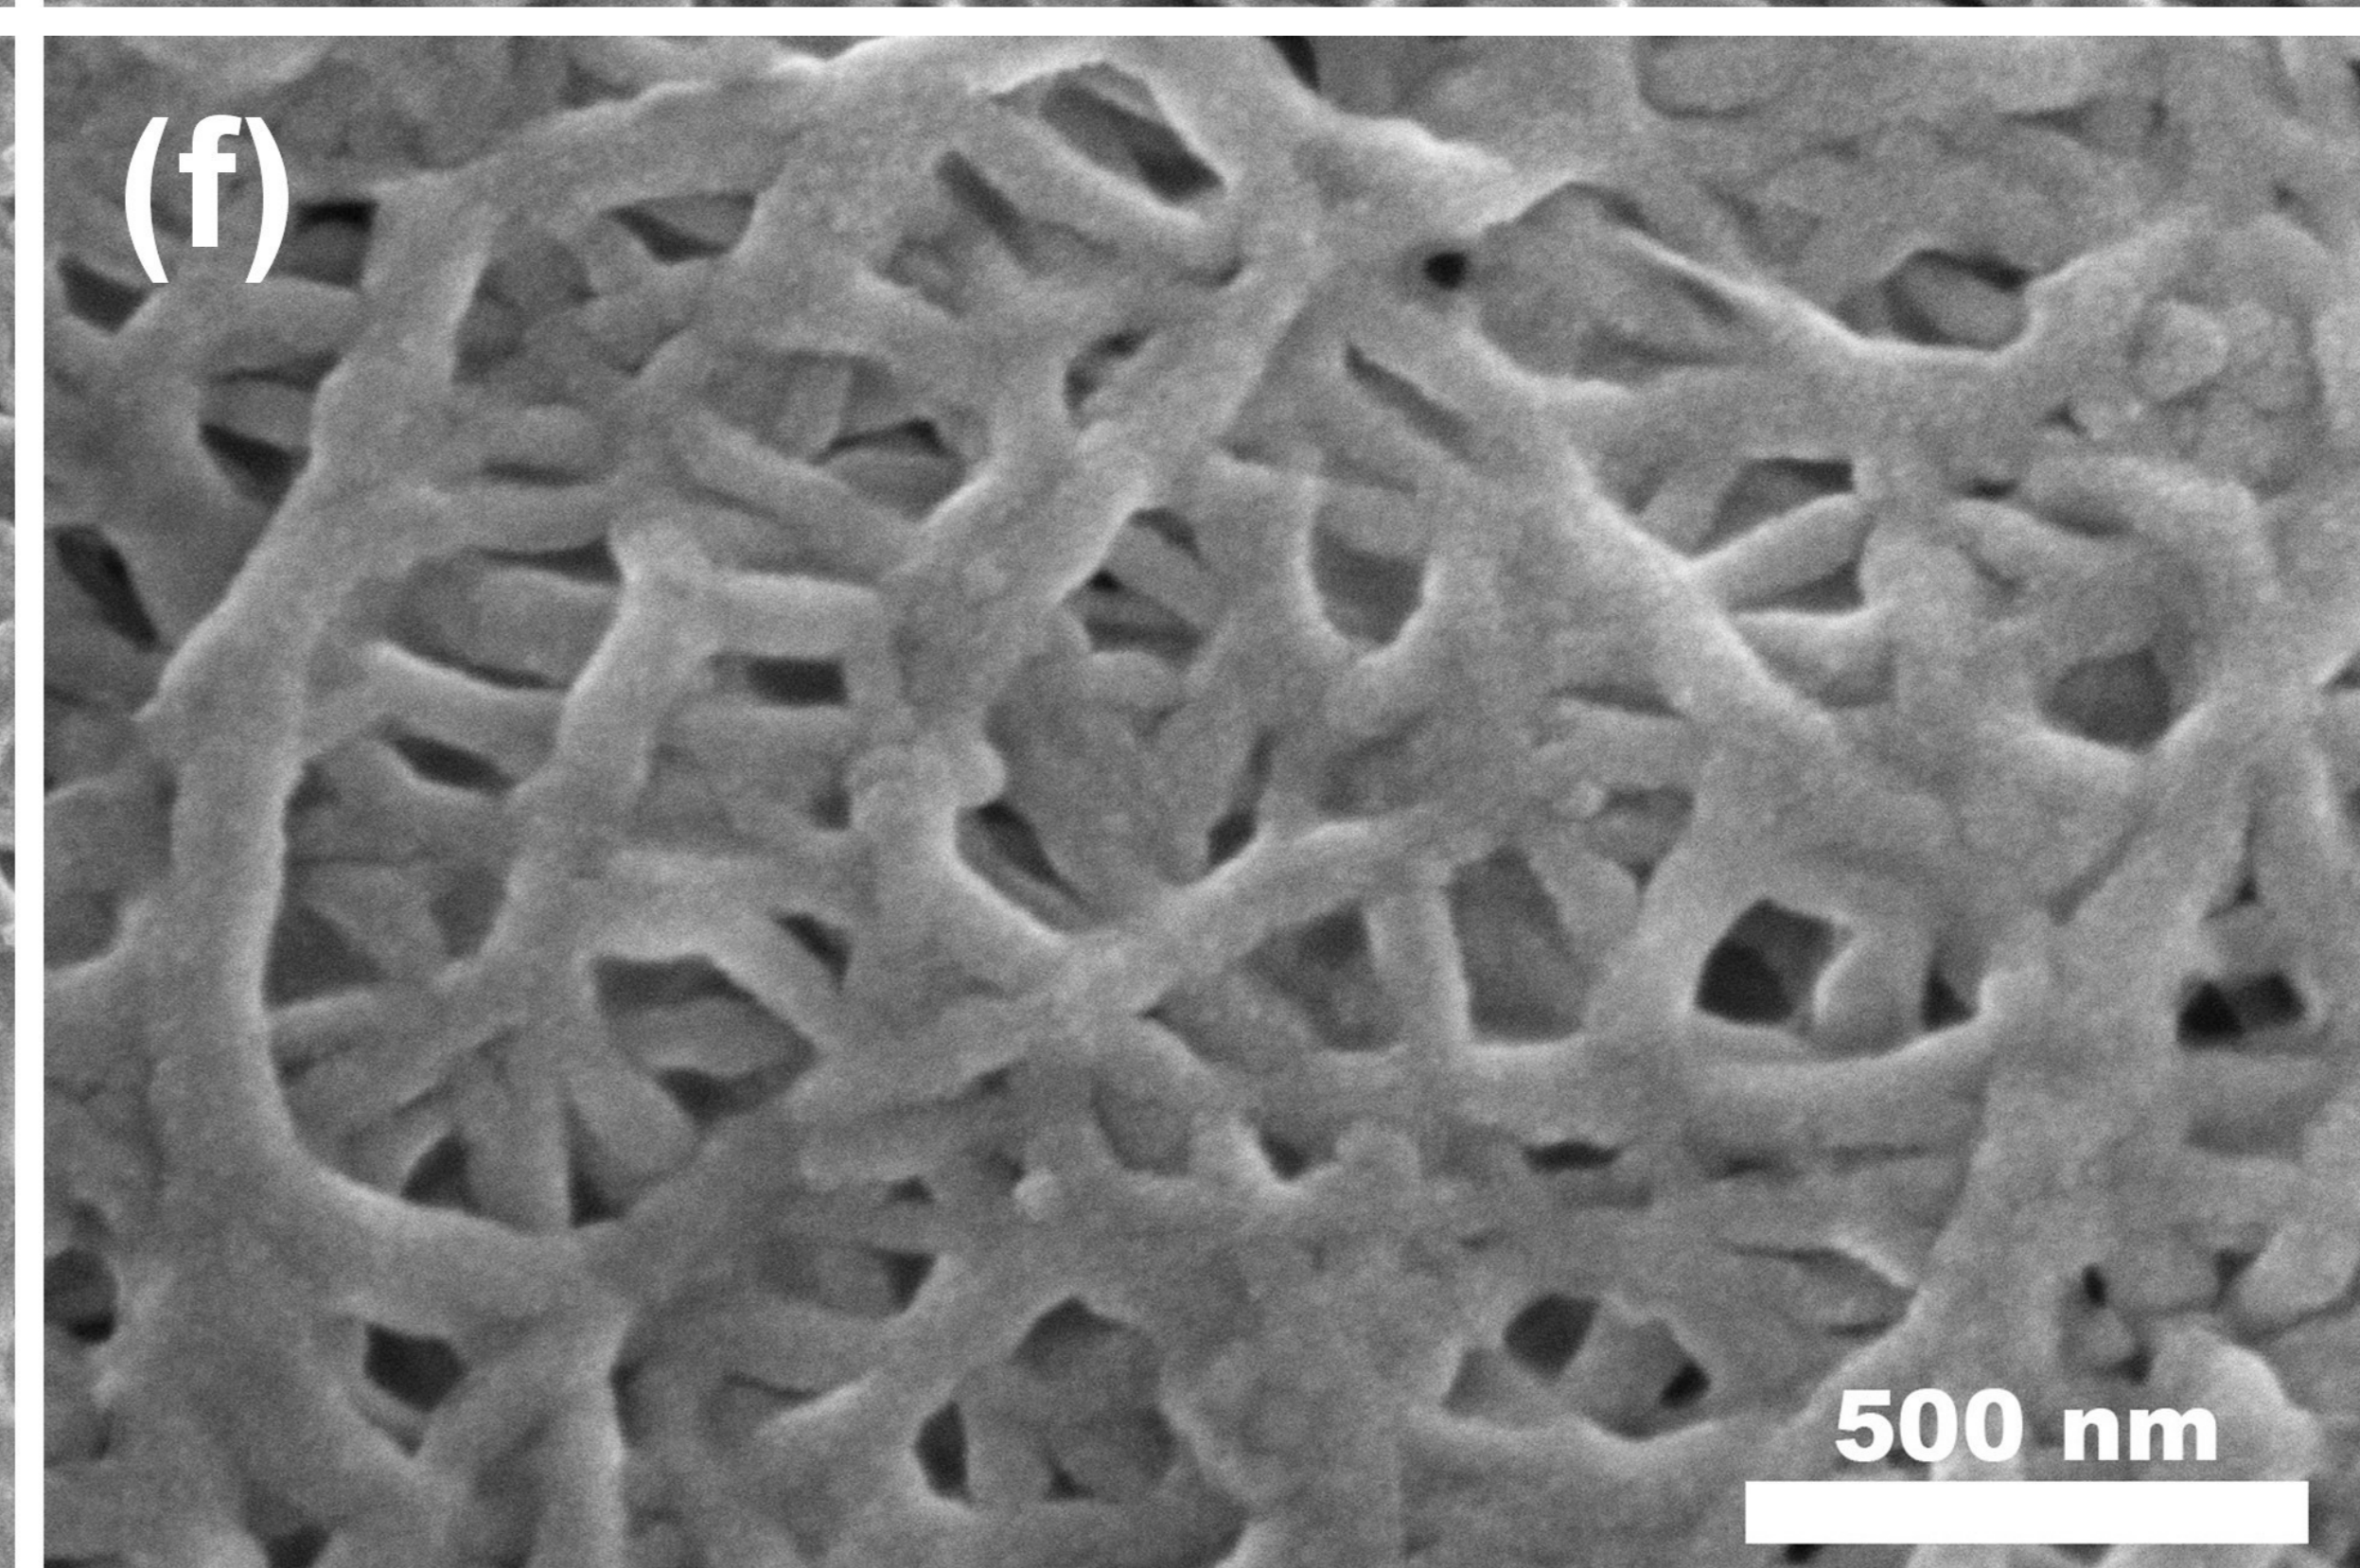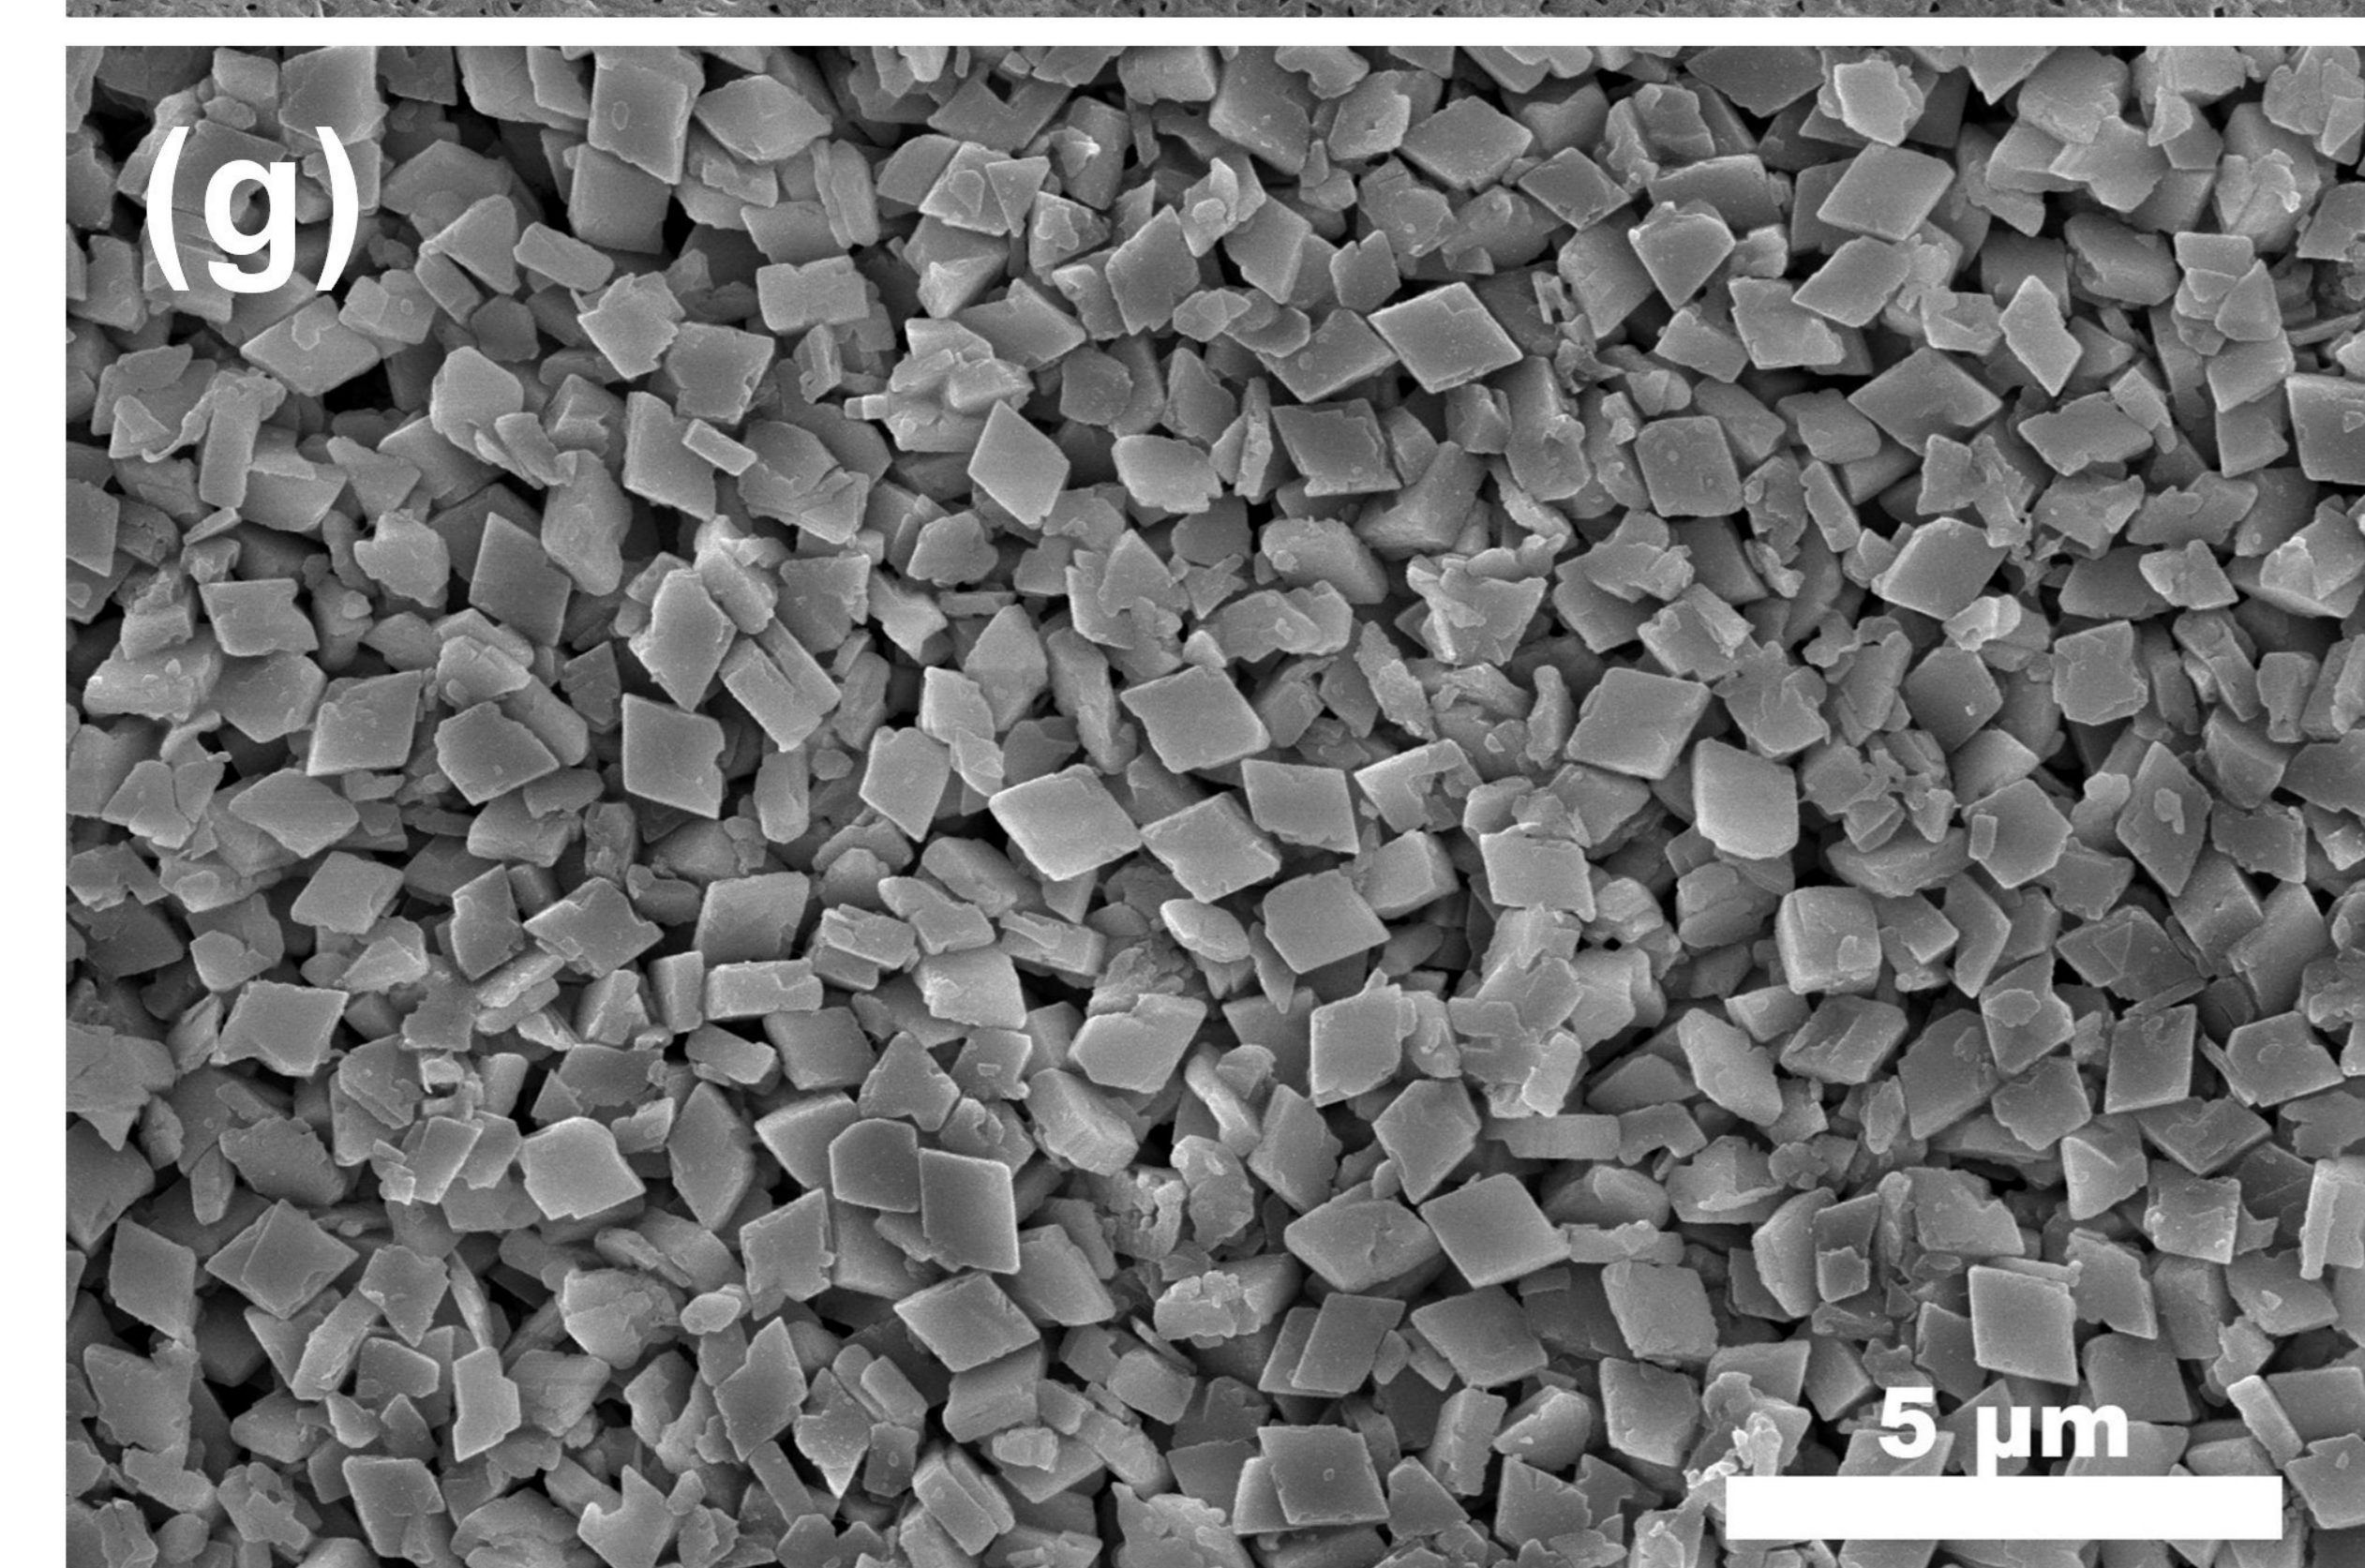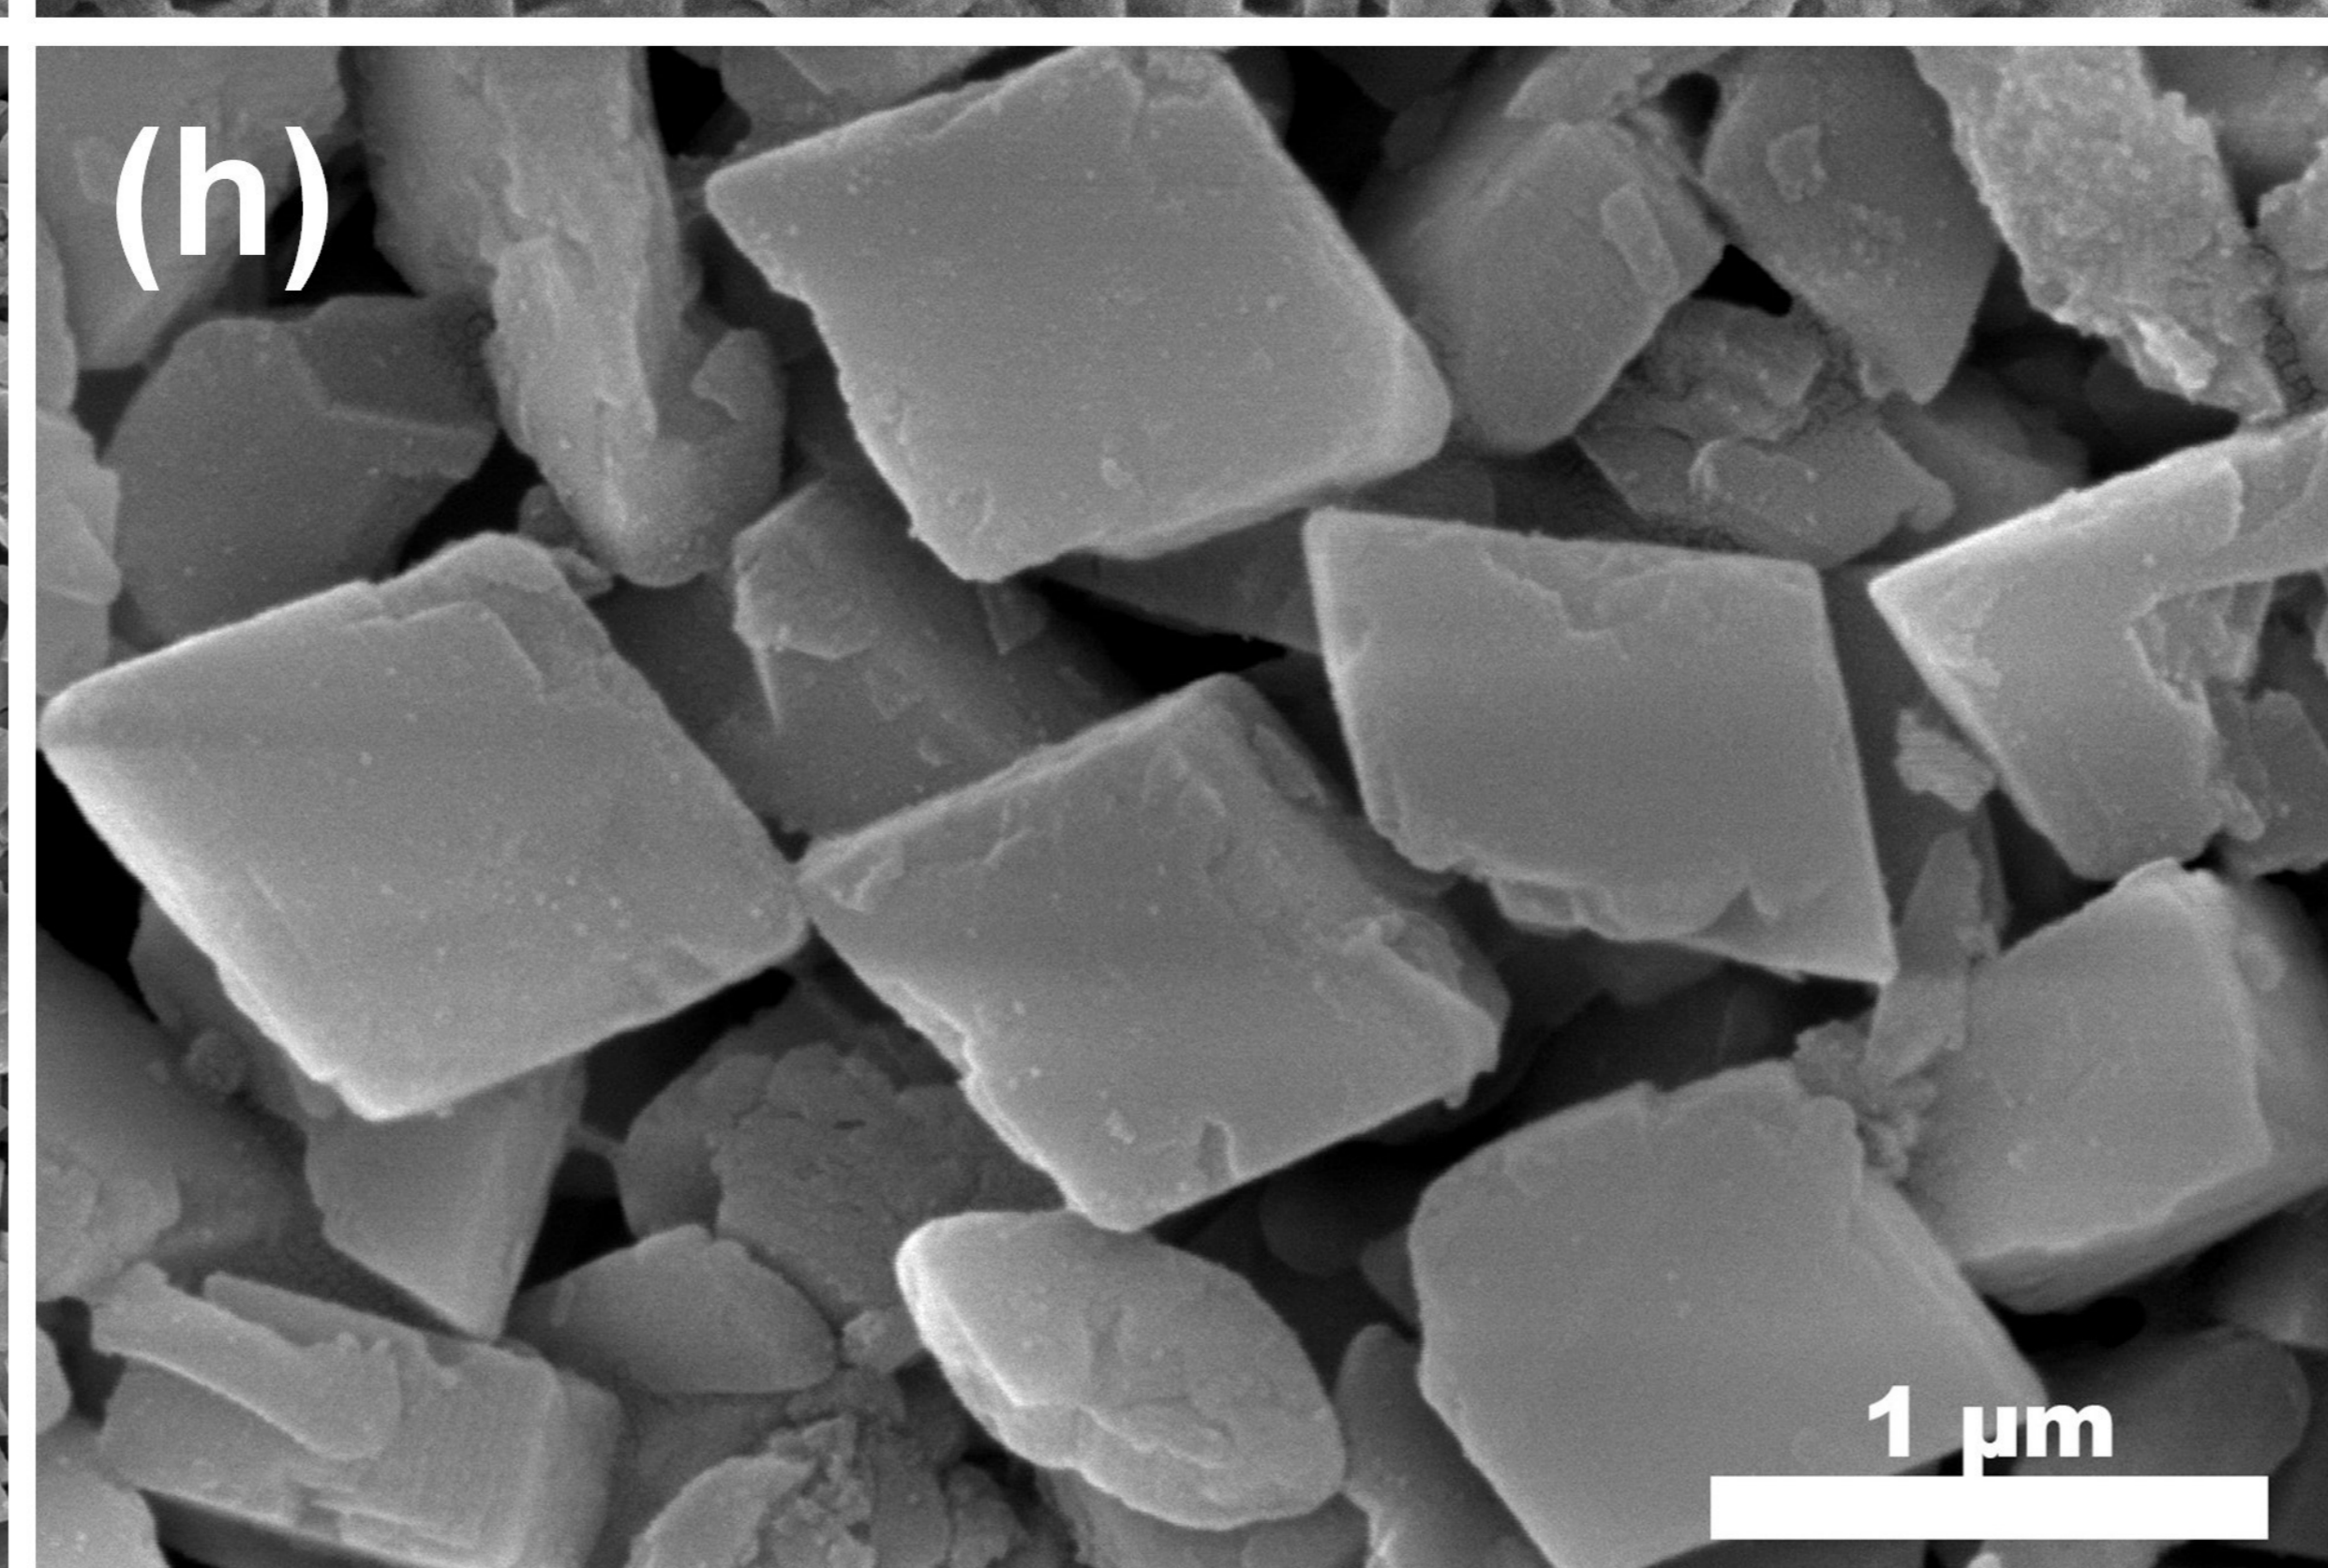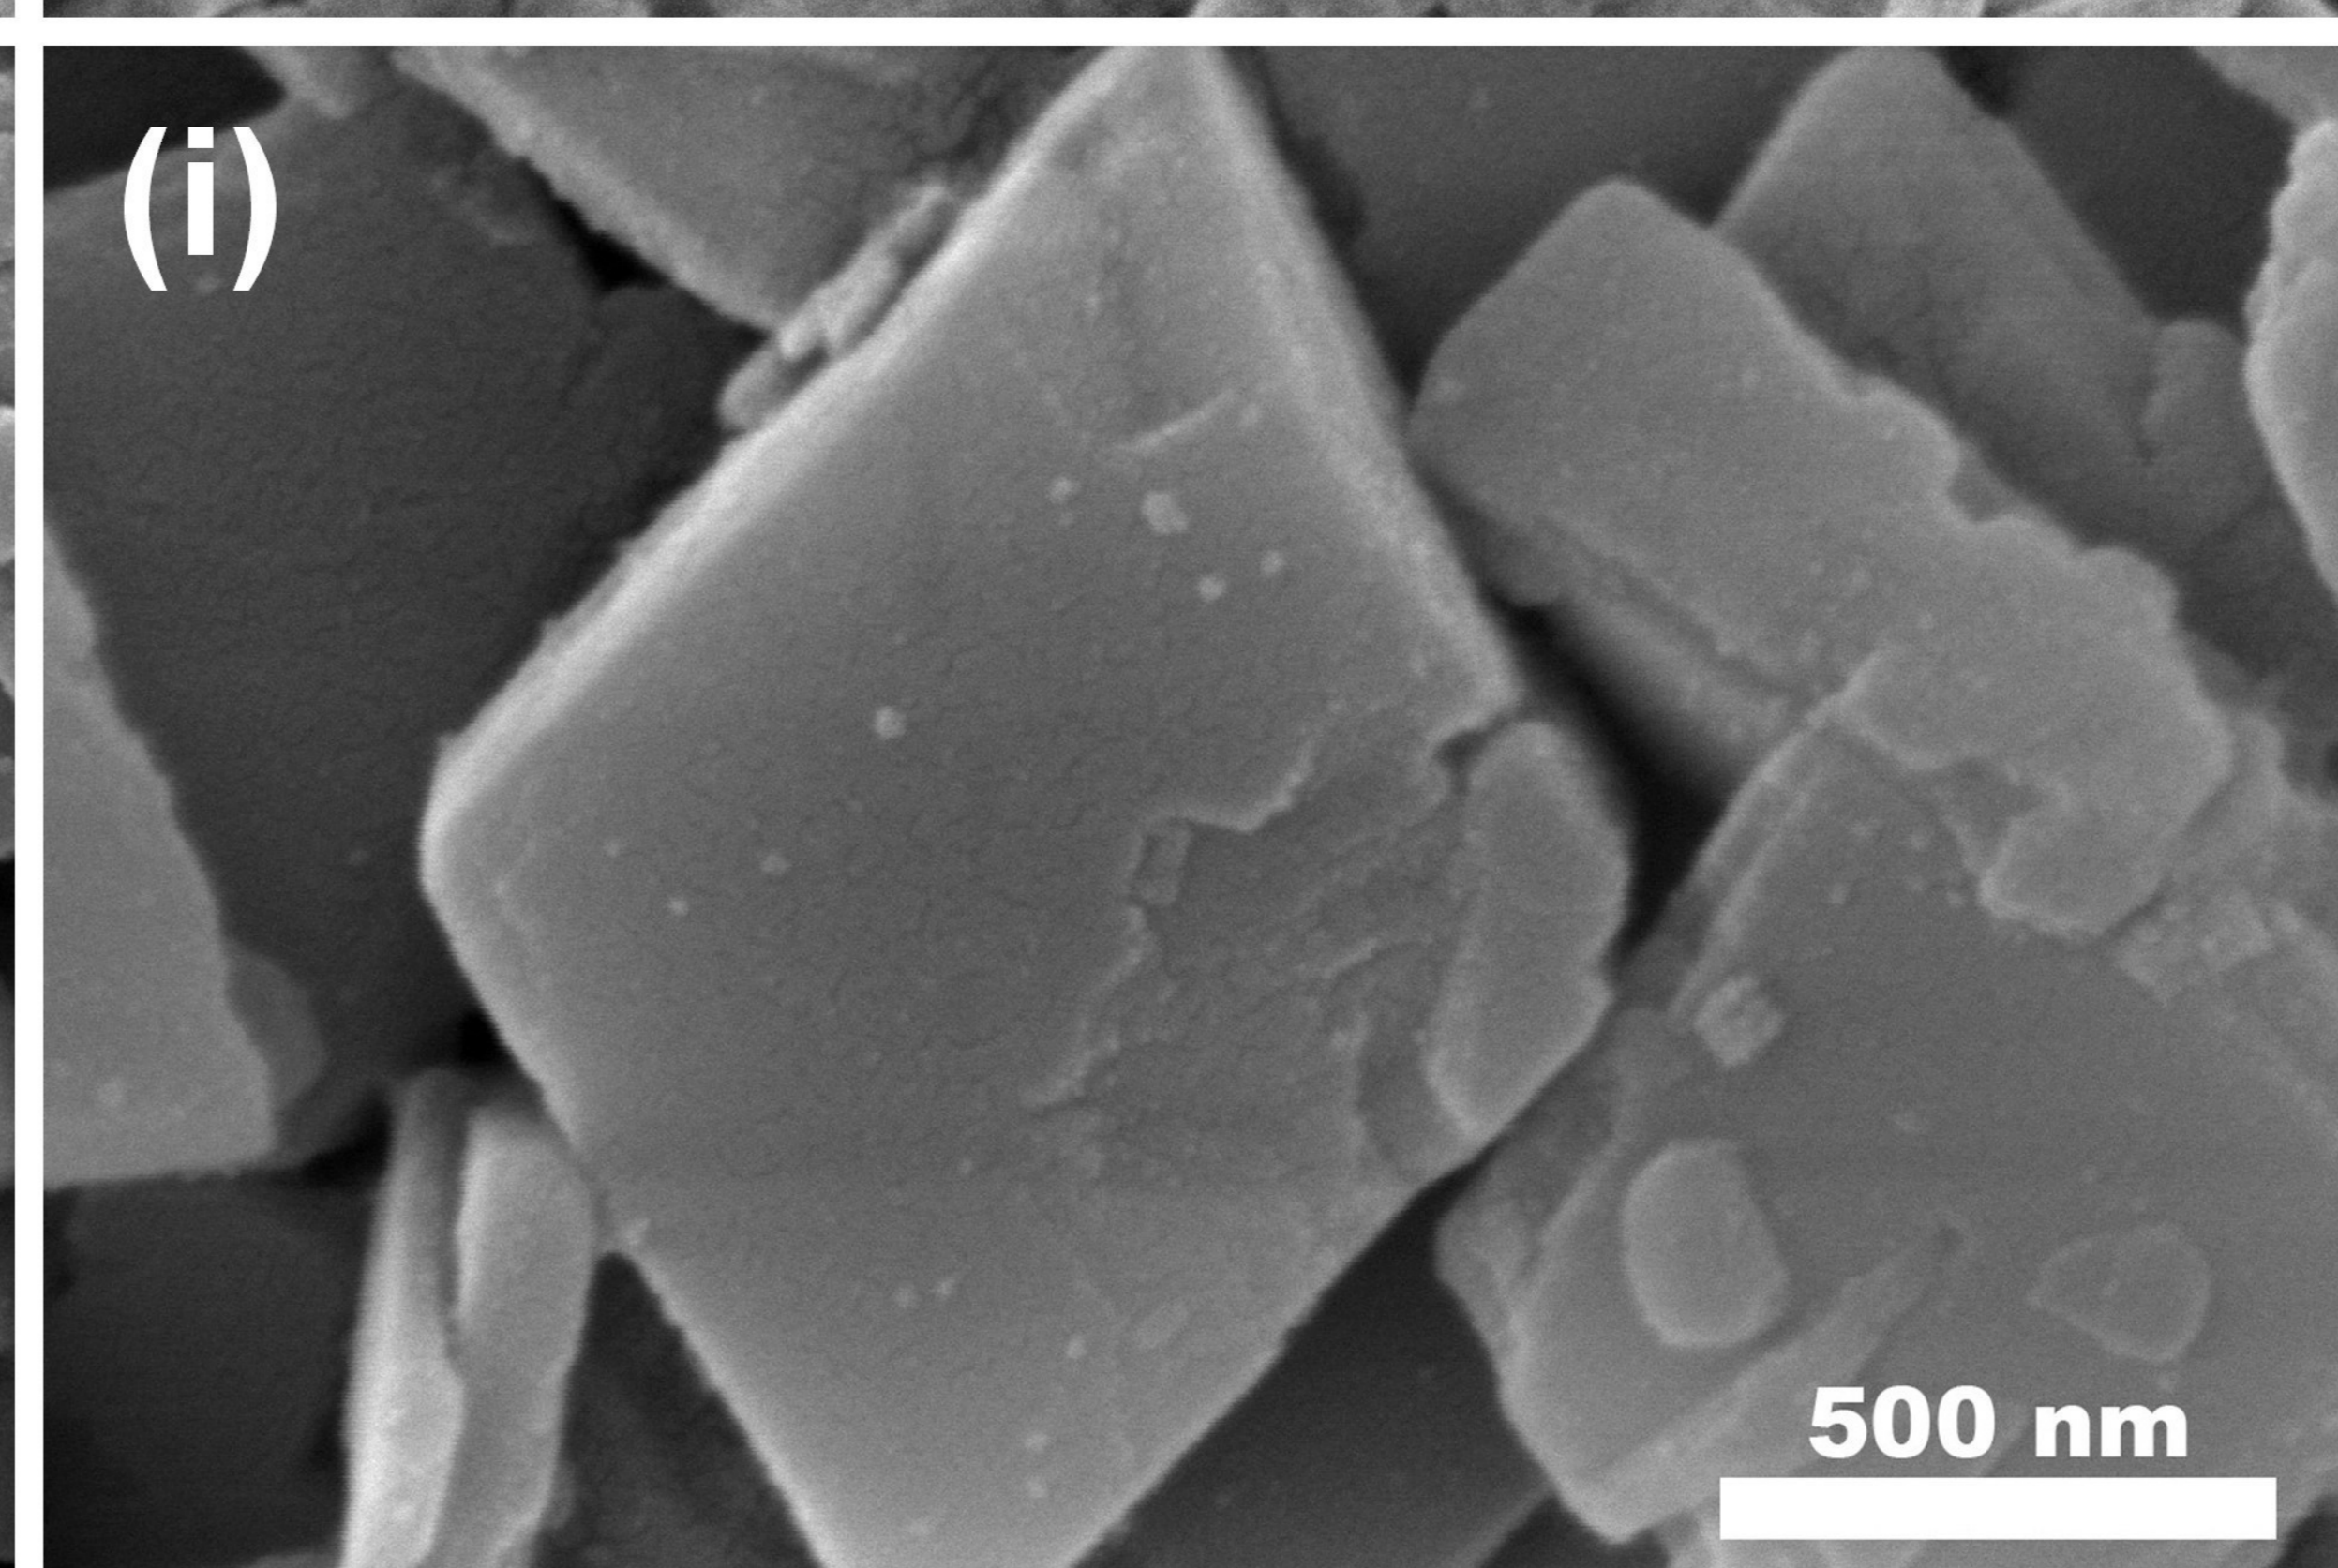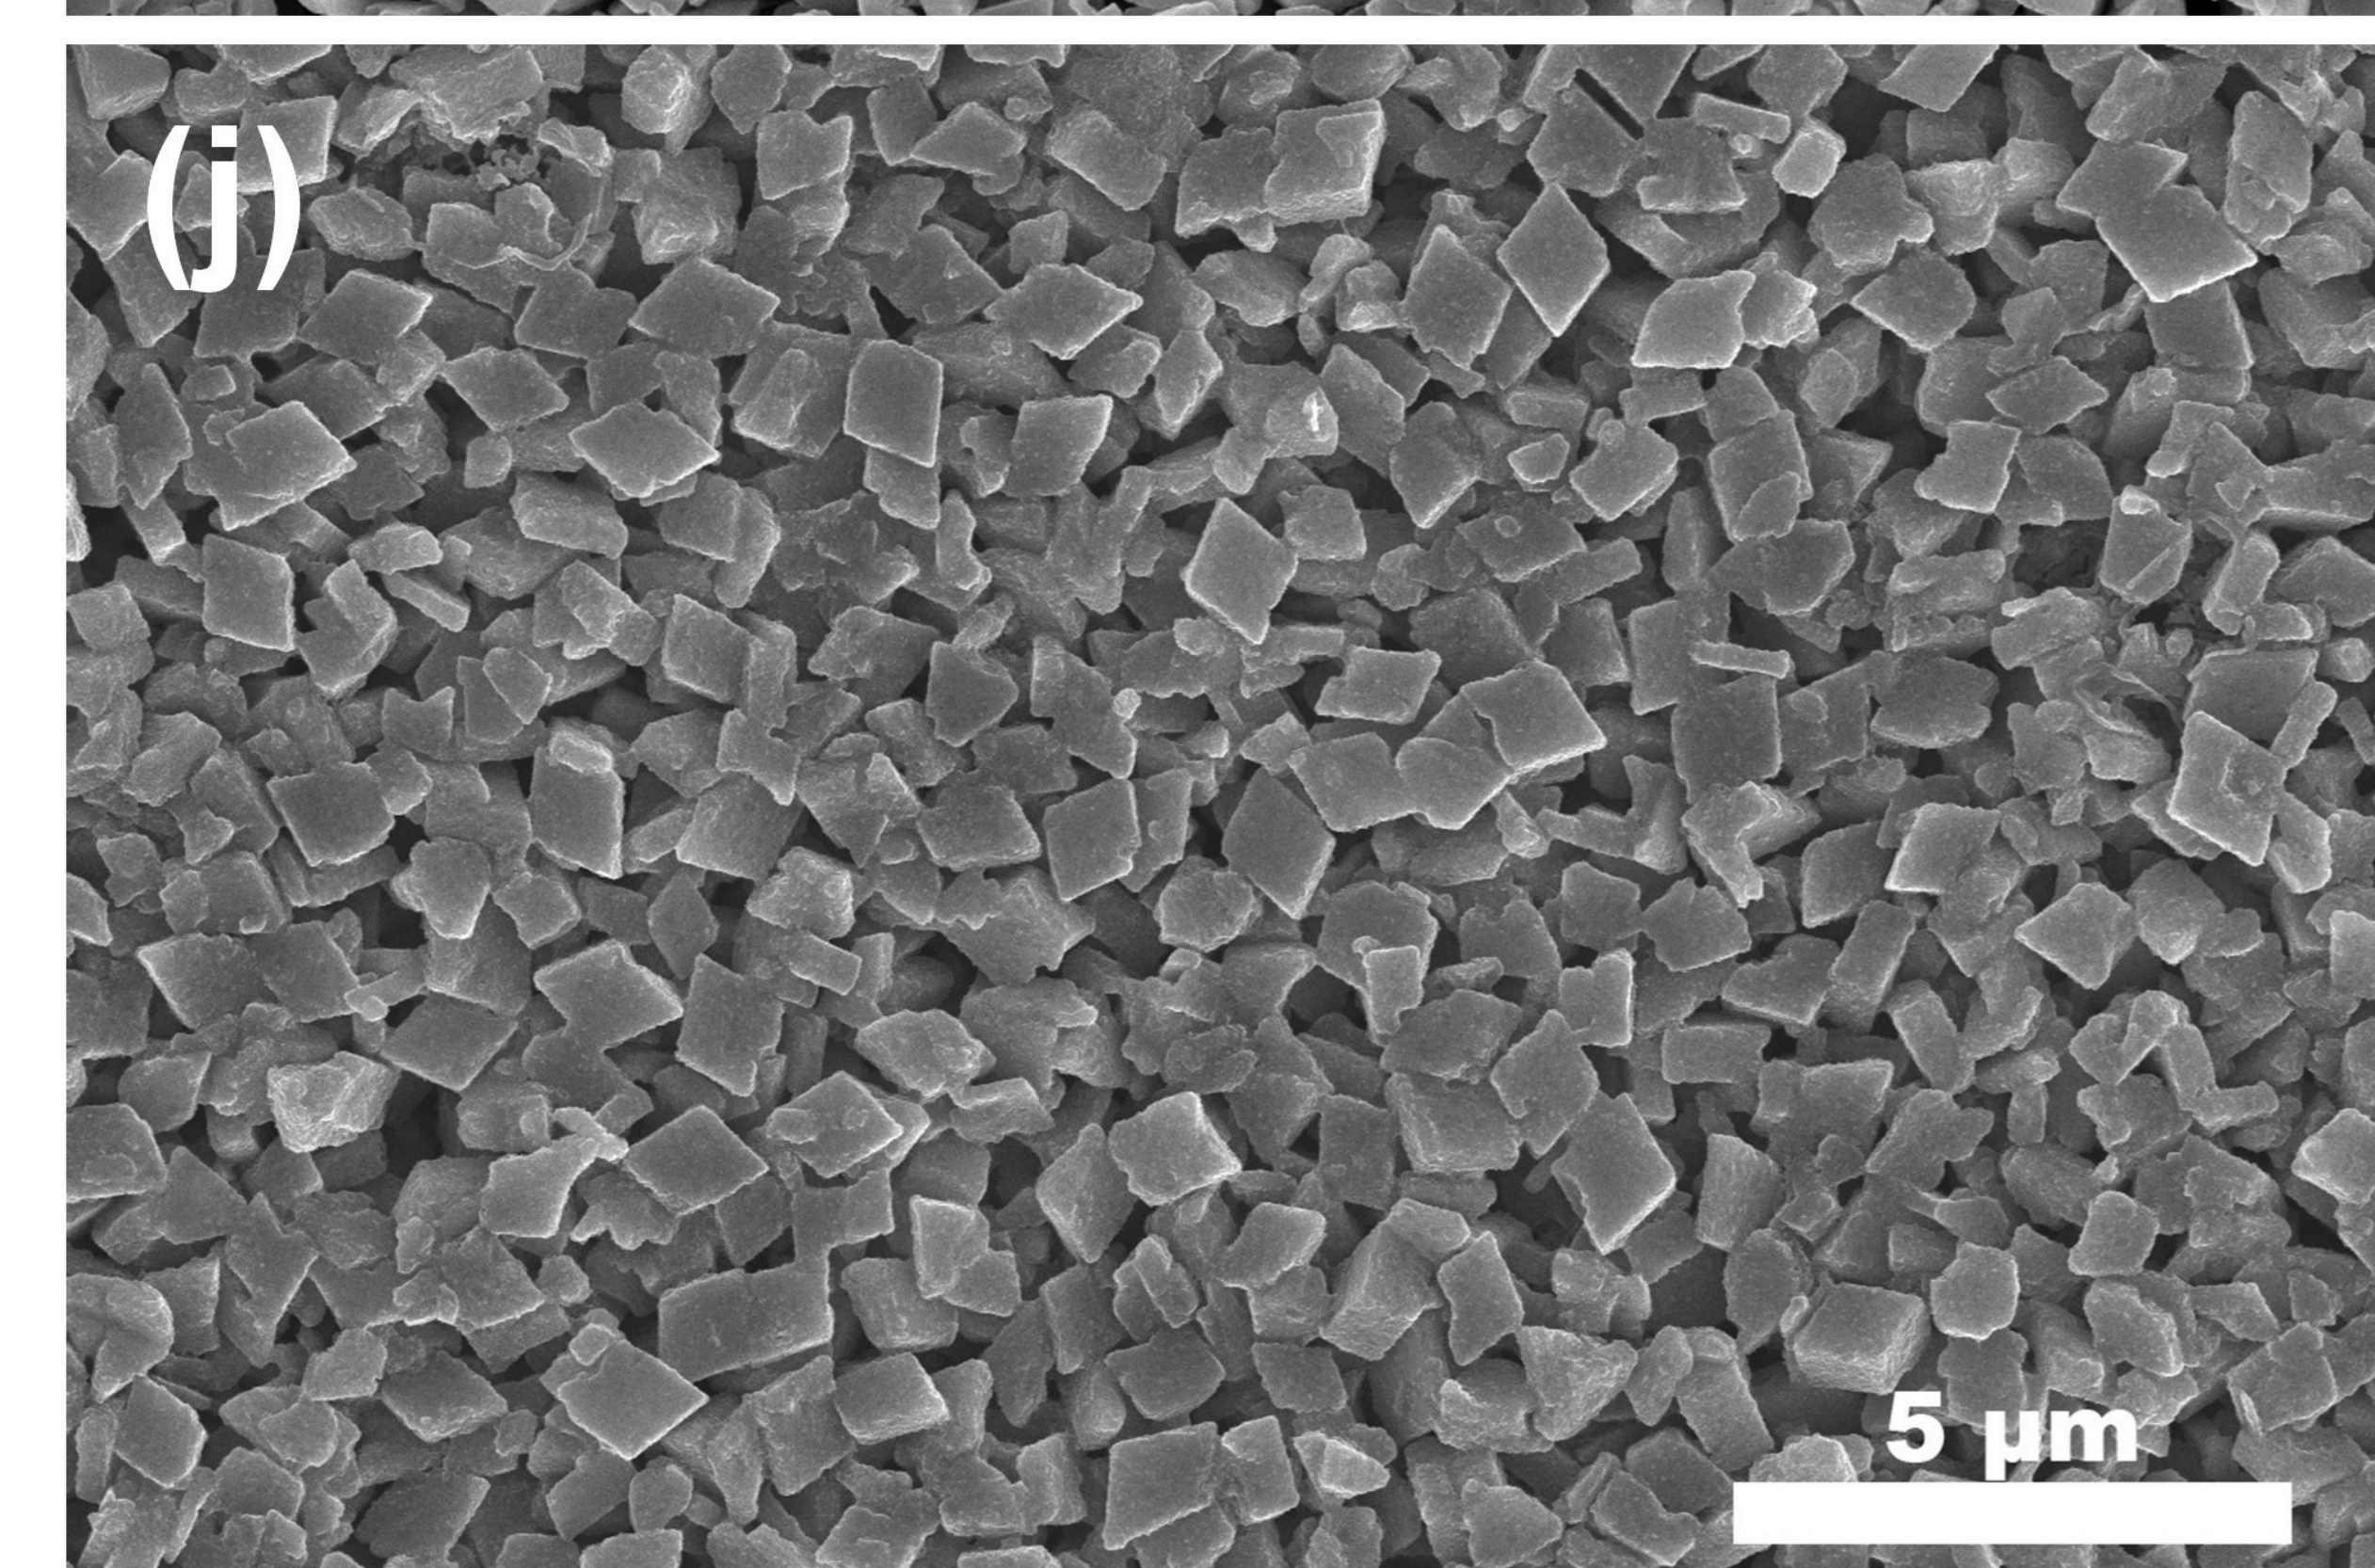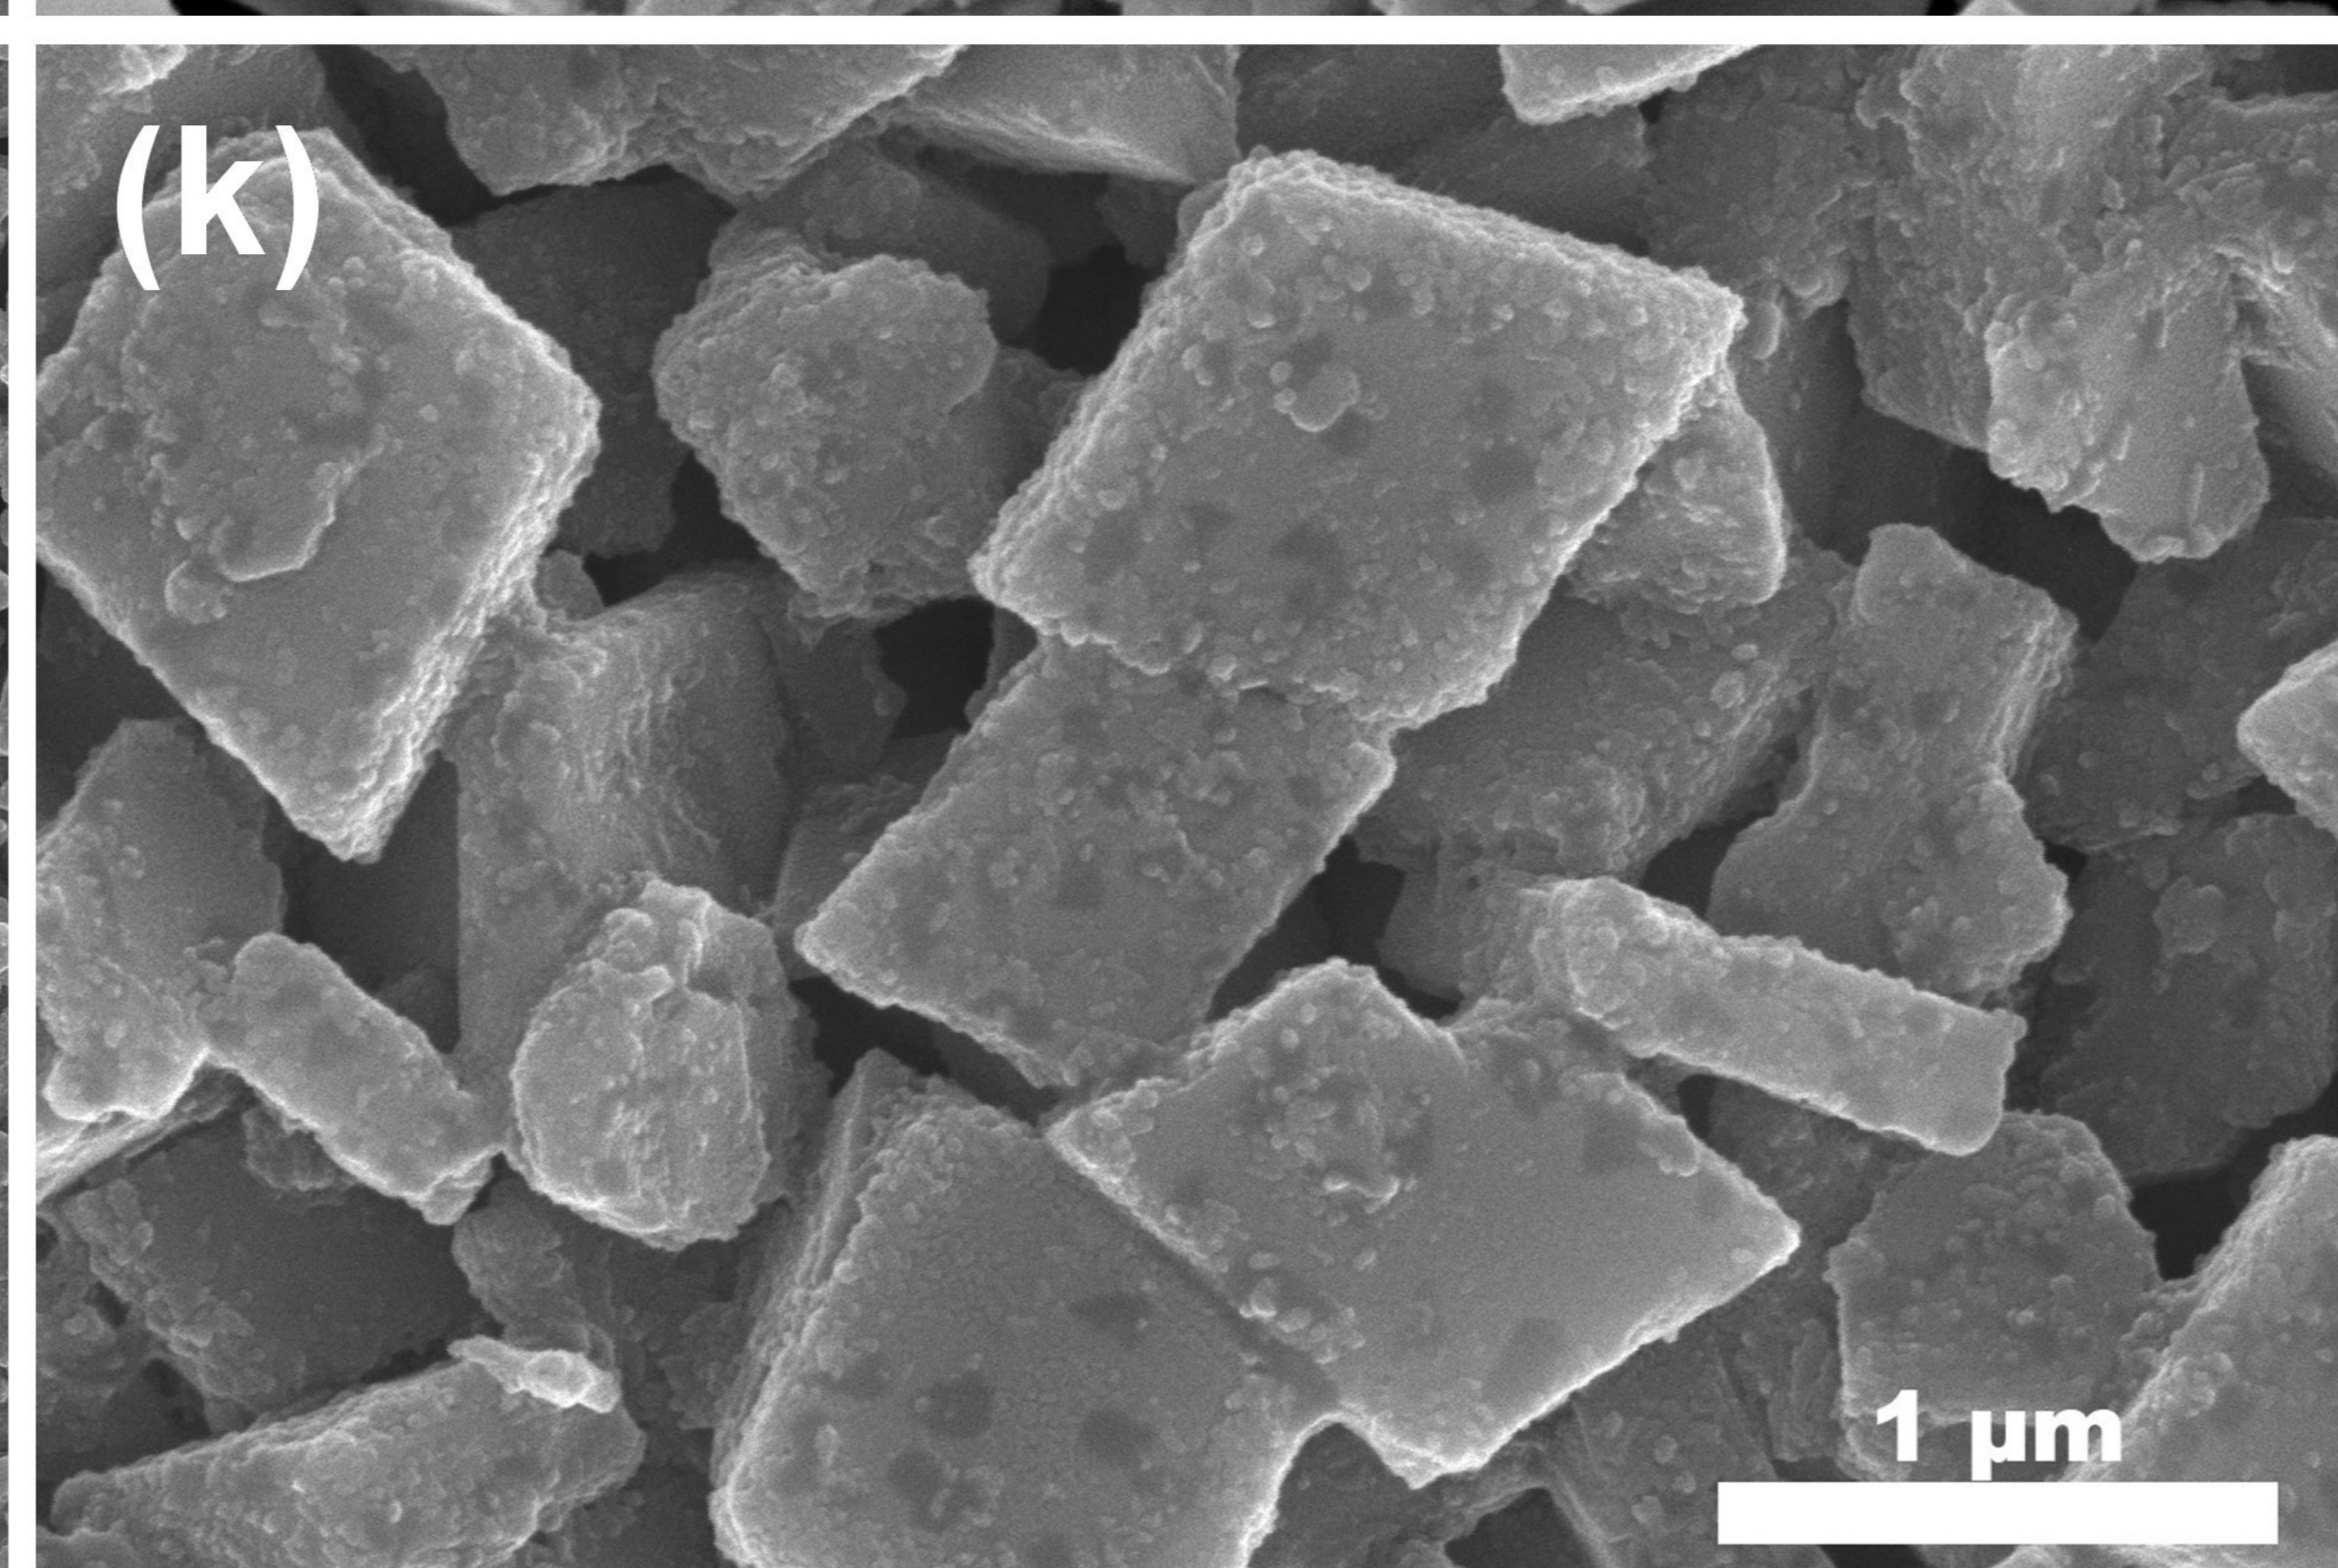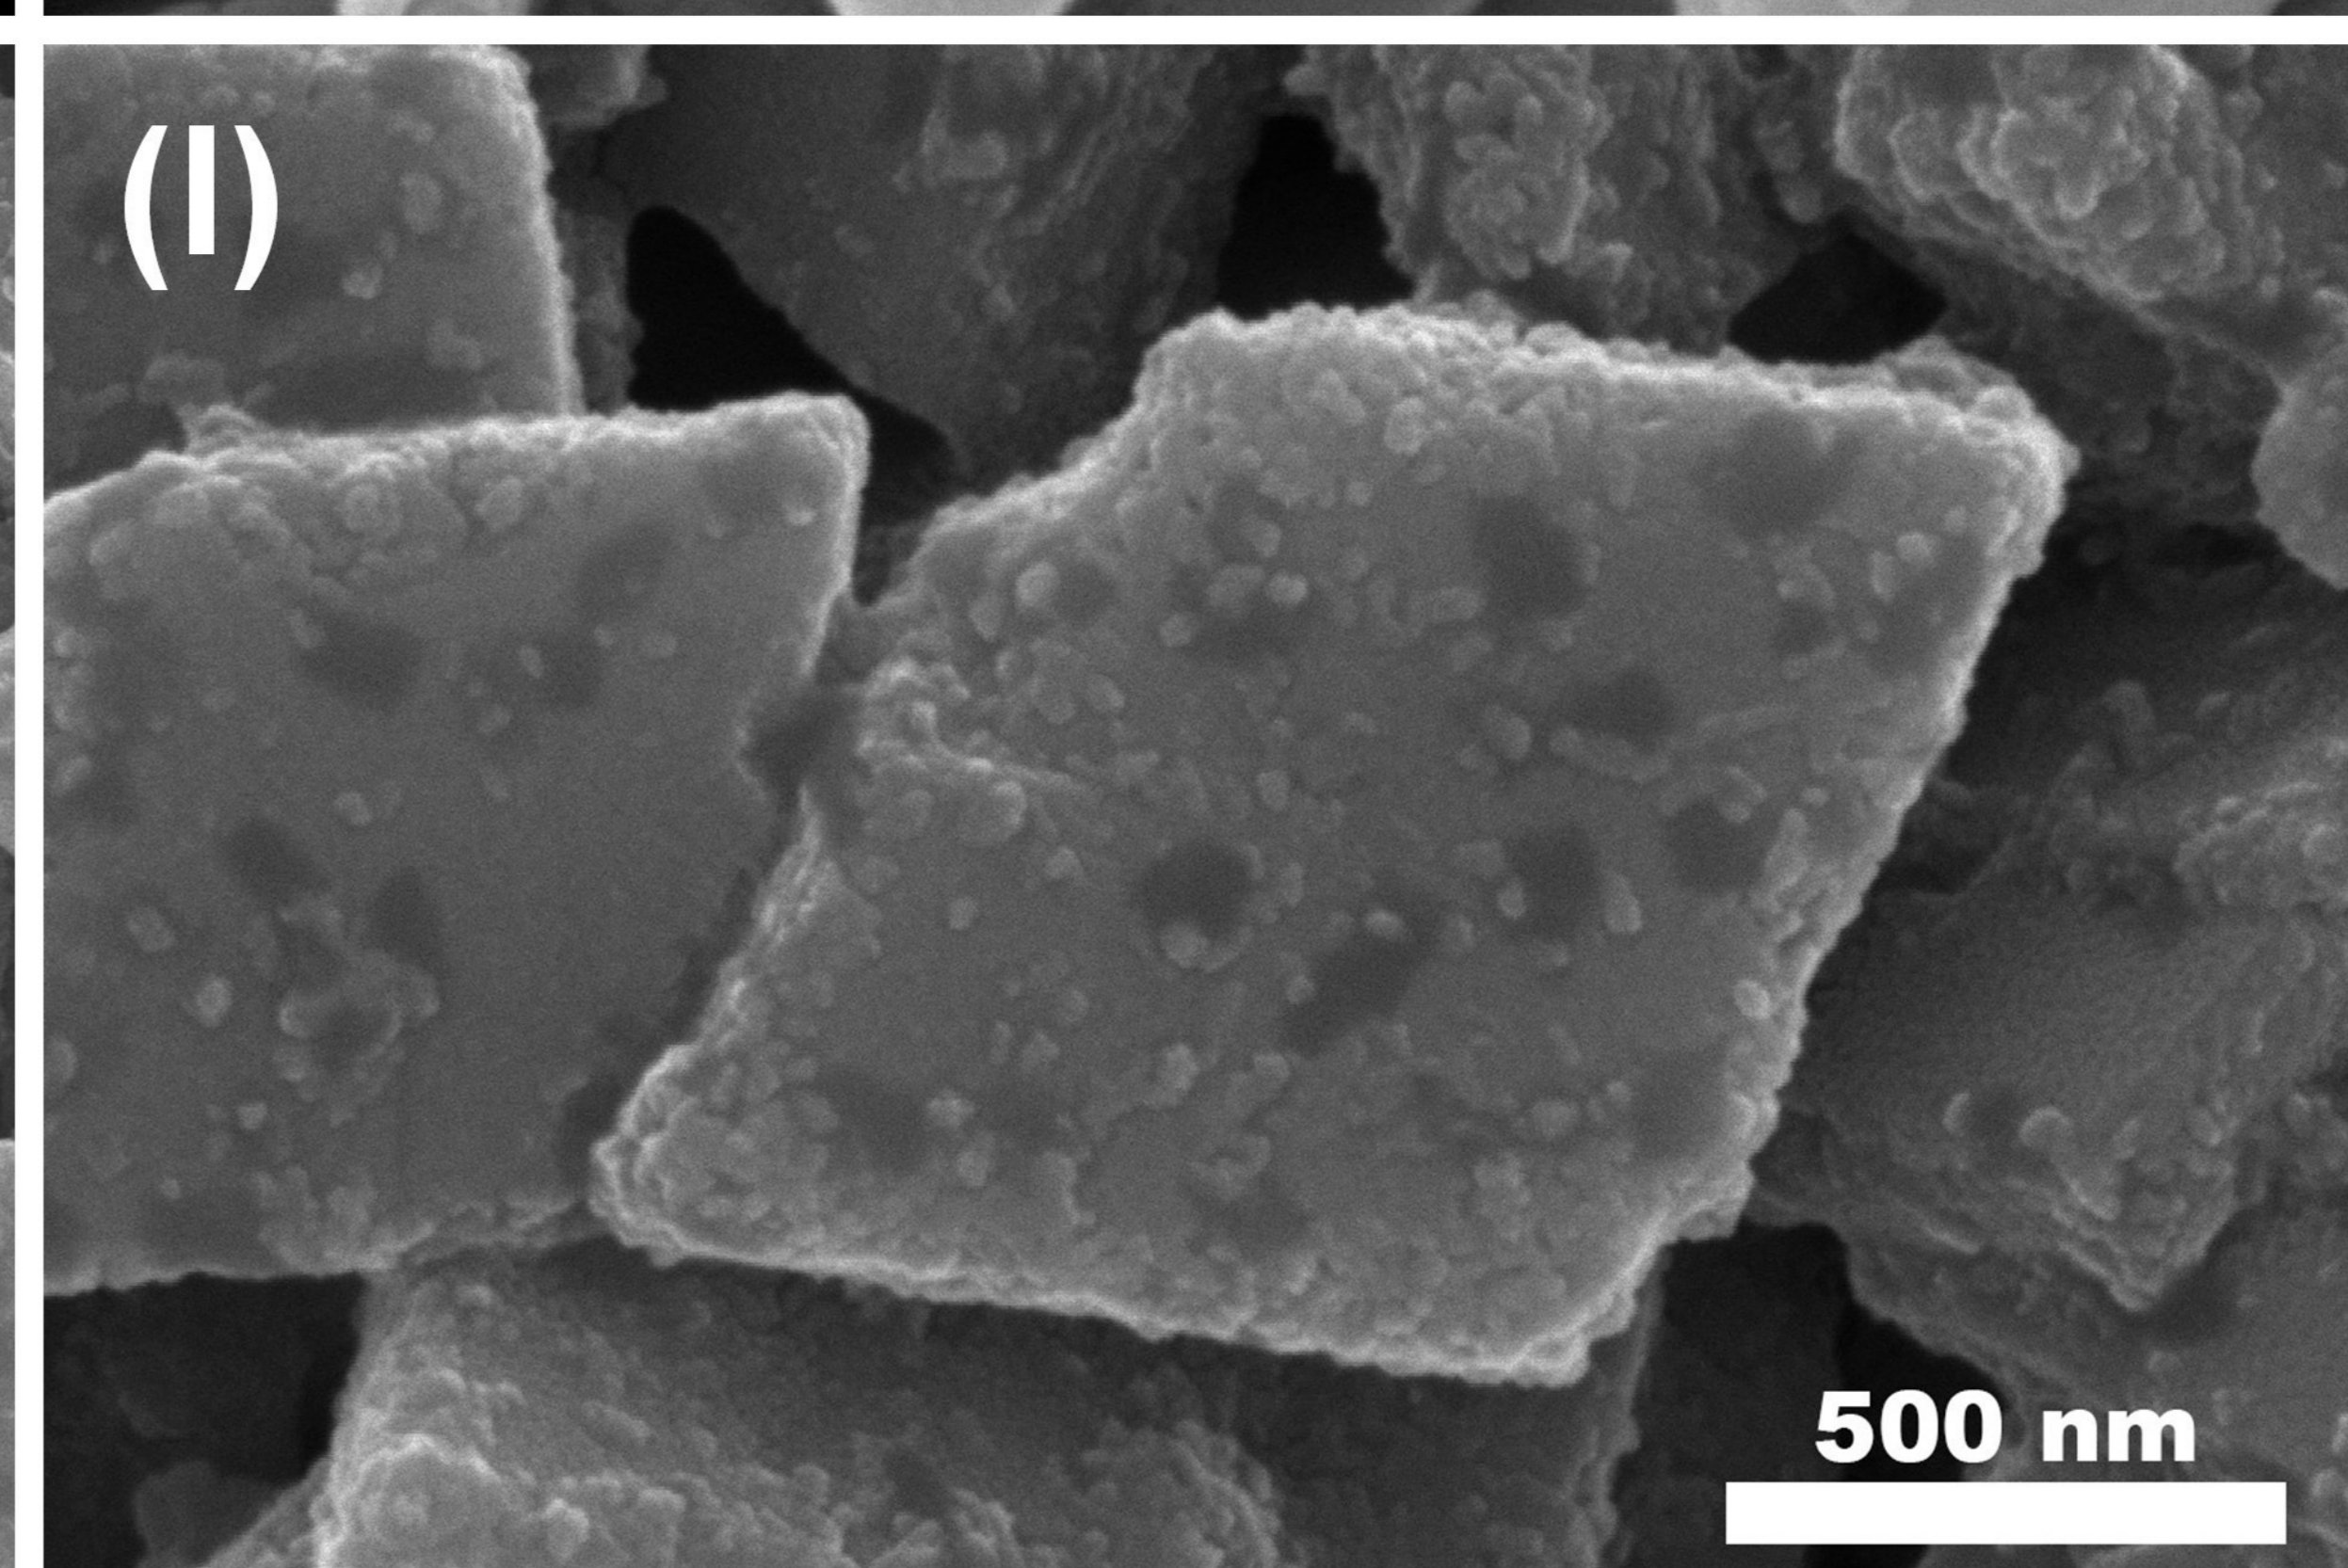

Supplement: d4ra00923a4.pdf [file d4ra00923a4.pdf]

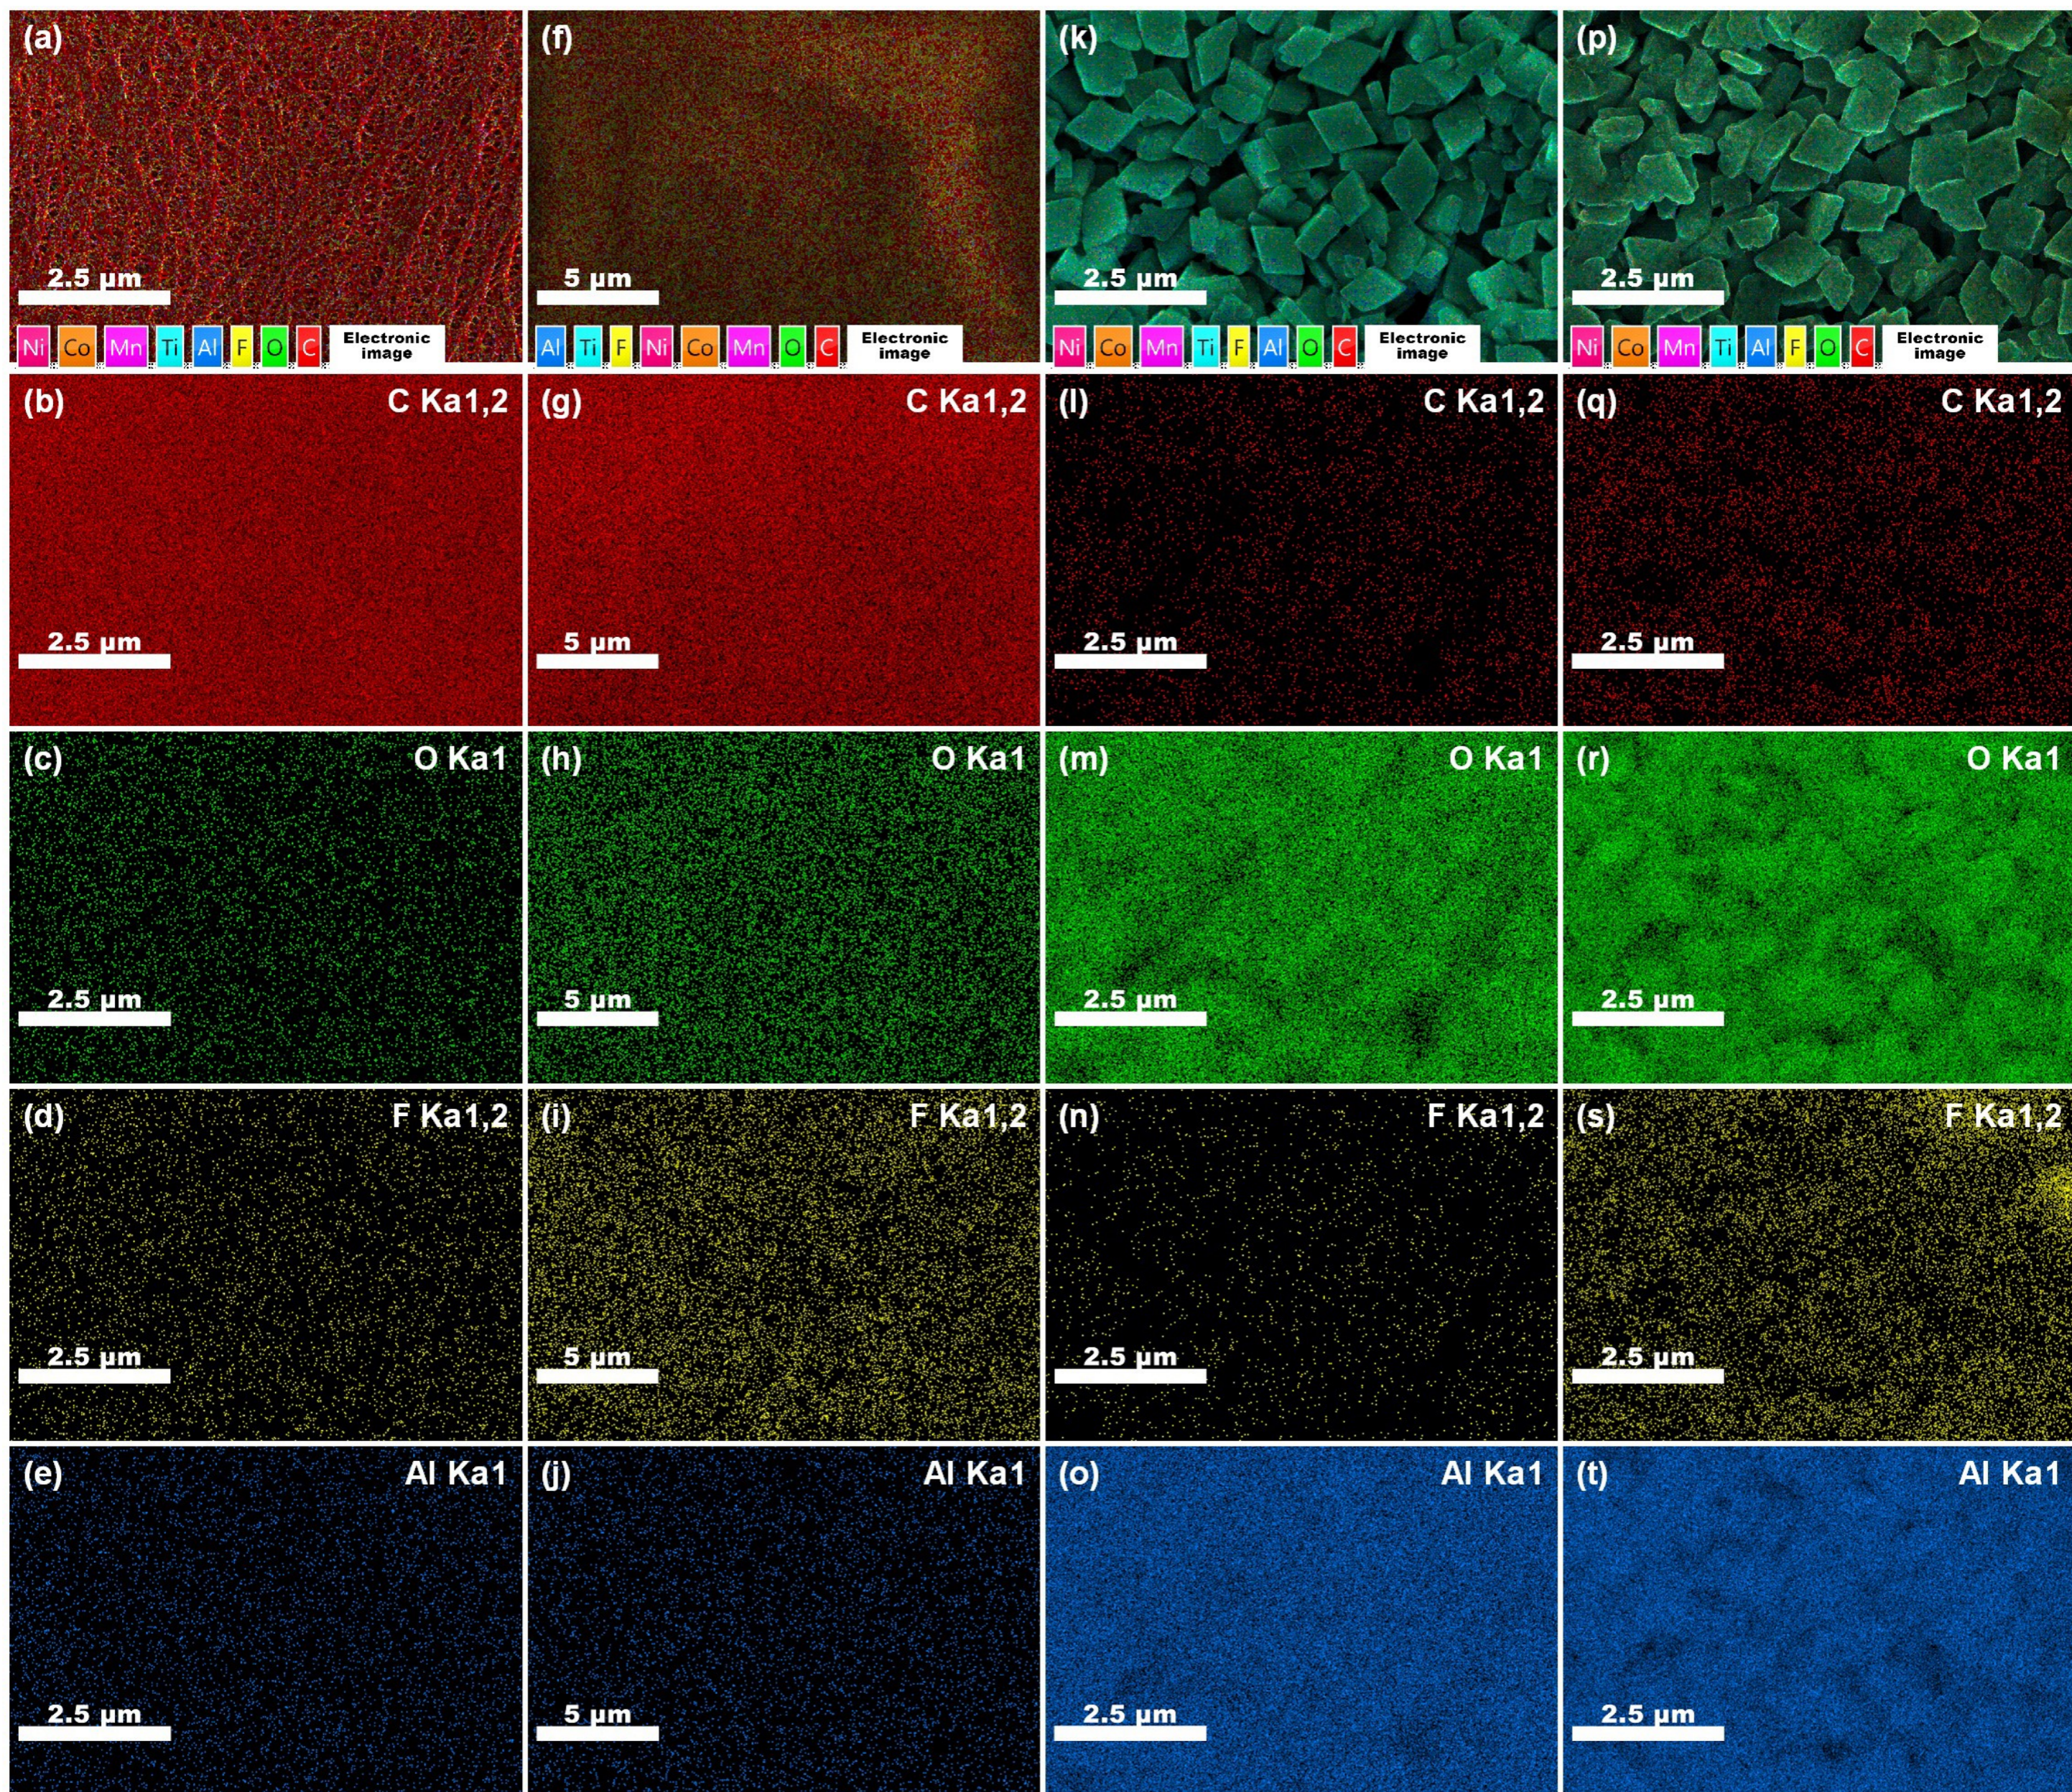

Supplement: d4ra00923a5.pdf [file d4ra00923a5.pdf]
